1 **TITLE PAGE**

2 Gsx2 but not Gsx1 is necessary for early forebrain patterning and long-term survival in zebrafish

3

4 Coltogirone RA<sup>1</sup>, Sherfinski EI<sup>1</sup>, Dobler ZA<sup>1</sup>, Peterson SN<sup>1</sup>, Andlinger AR<sup>1</sup>, Fadel LC<sup>1</sup>, Patrick  
5 RL<sup>1</sup>, Bergeron SA<sup>1,2</sup>

6

7 <sup>1</sup>Department of Biology, West Virginia University, Morgantown, WV, USA

8 <sup>2</sup>Department of Neuroscience, West Virginia University, Morgantown, WV, USA

9

10 Correspondence: [sadie.bergeron@mail.wvu.edu](mailto:sadie.bergeron@mail.wvu.edu)

11

12 Keywords: zebrafish, neurodevelopment, transcription factor, forebrain patterning, gs homeobox

13

14 **ABSTRACT**

15 Central nervous system (CNS) development is regulated by regionally expressed  
16 transcription factors that impart initial cell identity, connectivity, and function to neural circuits  
17 through complex molecular genetic cascades. *genomic screen homeobox 1* and *2* (*gsx1* and *gsx2*)  
18 encode homeobox transcription factors expressed in the developing CNS in multiple vertebrates  
19 examined to date. However, we have limited knowledge of the expression of these transcription  
20 factors and the gene networks that they regulate across developing brain regions in zebrafish.  
21 The objective of this study was to comprehensively examine *gsx1* and *gsx2* expression  
22 throughout neurodevelopment and characterize *gsx1* and *gsx2* mutants to study the essential roles  
23 of these closely related transcription factors. Using RT-PCR, whole-mount *in situ* hybridization  
24 (WISH), and fluorescence *in situ* hybridization, we examine *gsx1* and *gsx2* expression from early  
25 embryonic to late larval stages. *gsx1* is expressed initially in the hindbrain and diencephalon and  
26 later in the optic tectum, pretectum, and cerebellar plate. Comparatively, *gsx2* is expressed in the  
27 early telencephalon and later in the pallium and olfactory bulb. *gsx1* and *gsx2* are regionally co-  
28 expressed in the hypothalamus, preoptic area, and hindbrain, however rarely co-localize in the  
29 same cells. To identify forebrain target genes, we utilize mutants made with Transcription  
30 activator-like effector nucleases (TALEN). *gsx1* mutant zebrafish exhibit stunted growth,  
31 however, they survive through adulthood and are fertile. *gsx2* mutant zebrafish experience swim  
32 bladder inflation failure that prevents survival past larval stage. Using WISH and RT-qPCR we  
33 demonstrate altered expression of genes including, *distal-less homeobox* genes and *forkhead box*  
34 gene *foxp2*. This work provides novel tools with which other target genes and functions of *Gsx1*  
35 and *Gsx2* can be characterized across the CNS to better understand the unique and overlapping  
36 roles of these highly conserved transcription factors.

37

38

39

40

41

42

43

44

## 45 INTRODUCTION

46 Central nervous system (CNS) development is a complex process wherein regionally  
47 expressed transcription factors contribute significantly in determining initial neuronal cell  
48 identity, connectivity, and function<sup>1-3</sup>. Transcription factors act coordinately to activate or  
49 repress target gene expression in progenitor cell domains<sup>4,5</sup>. Differential gene expression  
50 amongst neural progenitors generates distinct cell types and specifies neuronal properties, such  
51 as cell neurotransmitter content as seen in mouse<sup>6-8</sup>, chicken<sup>9</sup>, and zebrafish<sup>10-12</sup>. This process  
52 ultimately imparts initial identity to mature neuronal cells and forms the basis for neural circuit  
53 assembly and function. Thus, defining the spatiotemporal expression patterns and essential roles  
54 of vertebrate transcription factors is important for elucidating the functional mechanisms  
55 governing neurodevelopment. More importantly, these studies can provide fundamental insights  
56 about the molecular genetic contributions to the diverse neuroanatomical and behavioral  
57 phenotypes that are associated with neurodevelopmental disorders.

58 *genomic screen homeobox 1 and 2 (gsx1 and gsx2, previously gsh1 and gsh2)* are closely  
59 related genes encoding homeobox transcription factors expressed in the CNS that were  
60 discovered in a screen for novel, non-clustered homeobox genes in mouse<sup>13</sup>. Homeobox genes  
61 characteristically encode transcription factors with a conserved 60-amino acid DNA-binding  
62 homeodomain<sup>14,15</sup>. Genes such as the *hox* genes specify cell types and body structures along the  
63 anterior-posterior (AP) axis in many species in patterns collinear with their 5' to 3' chromosomal  
64 positions within gene clusters<sup>15-18</sup>. As non-clustered and pseudo-clustered genes, *gsx1* and *gsx2*  
65 encode homeodomains with high (>80%) similarity to the *hox* genes<sup>4,5,19</sup>. *gsx1* and *gsx2* are the  
66 vertebrate homologs of *Drosophila melanogaster intermediate neuroblasts defective (ind)*. *ind*  
67 and the *gsx* genes similarly regulate dorsoventral (DV) patterning<sup>20-22</sup>, and *Ind* and murine *GSX2*  
68 elicit similar regulatory outcomes based on monomer versus homodimer DNA binding<sup>23</sup>.  
69 Interestingly, *ind* and the *gsx* genes are expressed in similar patterns in the fly neuroectoderm<sup>20</sup>,  
70 mouse neural tube<sup>24</sup>, and *Xenopus* neural plate<sup>25</sup>, supporting models for conserved neuroaxis  
71 domain specification across species.

72 Expression of *gsx1* and *gsx2* has been described in several vertebrates in varied detail.  
73 *gsx1* expression patterns are highly conserved across species, beginning in the hindbrain during  
74 somitogenesis in mouse<sup>24</sup>, *Xenopus*<sup>25</sup>, medaka<sup>26</sup>, and zebrafish<sup>27</sup>. During early embryonic stages  
75 in mouse *Gsx1* is expressed in the diencephalon and telencephalon and expands to the

76 hypothalamus, thalamus, optic stalk, medulla, pons, and cerebellum<sup>24</sup>. Early expression in  
77 *Xenopus*, medaka<sup>26</sup>, and zebrafish<sup>27,28</sup> occurs in similar regions such as the hypothalamus,  
78 olfactory bulb, optic tectum, and cerebellum. *gsx1* is also expressed as two dorsolateral stripes in  
79 the hindbrain and in the intermediate spinal cord in mice<sup>24</sup>, medaka<sup>26</sup>, and zebrafish<sup>10</sup>. *gsx2* is  
80 first detected slightly later than *gsx1* in the telencephalon and mesencephalon in mice and in the  
81 hindbrain in *Xenopus*<sup>25,29</sup>. Throughout neurodevelopment *gsx2* is expressed in the telencephalon,  
82 thalamus, hypothalamus, and cerebellum in mouse<sup>29</sup>, *Xenopus*<sup>25</sup>, and zebrafish<sup>30</sup>. Like *gsx1*,  
83 expression of *gsx2* appears similarly across species as two dorsolateral stripes in the hindbrain.  
84 *Gsx2* is expressed dorsal to *Gsx1* in the hindbrain in *Xenopus*<sup>25</sup> and in the spinal cord of  
85 zebrafish<sup>10</sup>, consistent with their roles in DV patterning. Outside of the aforementioned  
86 reports<sup>10,27,28,30</sup>, expression of zebrafish *gsx1* and *gsx2* has not been comprehensively  
87 characterized and compared across all embryonic and early larval stages. Here we capitalize on  
88 the zebrafish model, which allows whole brain *in vivo* examination of expression to rigorously  
89 define the *gsx1* and *gsx2* expression profile. Defining a more complete expression profile of the  
90 *gsx* genes in zebrafish is an important step forward in elucidating critical Gsx1 and Gsx2  
91 functions.

92 GSX1 and GSX2 promote regional neuronal identity in the ventral telencephalon and  
93 regulate the development of cortical, striatal, and olfactory bulb interneurons in mice<sup>21,31-40</sup>.  
94 Despite having similar roles in progenitor specification, GSX1 and GSX2 differentially regulate  
95 progenitor maturation; *Gsx2* maintains progenitors in an undifferentiated state while *Gsx1*  
96 promotes maturation by downregulating *Gsx2*<sup>22,34</sup>. *Gsx1* is implicated in hypothalamic and  
97 pituitary development, as knockout (KO) mice display a dwarf phenotype, reduced pituitary size,  
98 hormonal imbalances, and only survive a few weeks post-birth<sup>41</sup>. Consistently, *Gsx1* specifies  
99 multiple types of neuropeptidergic neurons in the arcuate nucleus of the hypothalamus<sup>42</sup>. *Gsx2*  
100 mouse KOs do not survive more than one day following birth, exhibit disturbed forebrain and  
101 hindbrain morphology<sup>43</sup>, and have expanded *Gsx1* expression in the ventral telencephalon<sup>44</sup>.  
102 Interestingly, *Gsx1* and *Gsx2* double KO mice display more severe forebrain phenotypes than  
103 *Gsx2* single KOs, supporting a model in which GSX1 partially compensates for loss of GSX2  
104 function<sup>21,44,45</sup>. While much is known in the mouse forebrain, many key neurodevelopmental  
105 roles for *gsx1* and *gsx2* remain unknown, and roles for these transcription factors across the CNS  
106 have yet to be fully characterized in any vertebrate.

107           Outside of the forebrain, limited functional roles are reported for GSX1 and GSX2 in  
108 mammalian and non-mammalian model systems. *Gsx1* regulates an identity switch in mouse  
109 cerebellar neuronal progenitors in part through BMP/SMAD signaling<sup>46,47</sup>. Through a Notch  
110 signaling dependent mechanism, *Gsx1* and *Gsx2* regulate the temporal specification of  
111 glutamatergic and GABAergic interneurons in the mouse spinal cord<sup>7</sup>. In this region *Gsx1* also  
112 promotes neural stem and progenitor cell generation and decreases reactive glial scar formation  
113 to facilitate recovery from injury<sup>48</sup>. *gsx1* is implicated as a molecular marker of glutamatergic  
114 interneurons in the dorsal brainstem in zebrafish that regulate the acoustic startle response, and  
115 zebrafish with ablated *gsx1*-expressing neurons and mouse *Gsx1* knockouts similarly exhibit  
116 disrupted responsiveness to single and paired pulse acoustic-vibrational stimuli<sup>28,49</sup>. In zebrafish,  
117 *gsx2* is required for specification of neurons in the inferior olivary nuclei of the medulla<sup>30</sup>. *gsx1*  
118 and *gsx2* mark specific progenitor domains in the spinal cord of transgenic zebrafish similarly to  
119 mouse, with *gsx1* domains specifying glutamatergic, GABAergic, and glycinergic fates, and *gsx2*  
120 domains specifying glutamatergic fates only<sup>10</sup>.

121           Some GSX1 and GSX2 transcriptional target genes have been reported in the mouse  
122 forebrain and other brain regions<sup>24,29,45,50,51</sup>. However, target gene regulation by *Gsx1* and *Gsx2*  
123 across many brain regions has been understudied across vertebrates, including zebrafish. Several  
124 zebrafish orthologs for mouse GSX1 and GSX2 target genes exist, one example being *Distal-less*  
125 *homeobox 2* (*Dlx2*). Two paralogs, *dlx2a* and *dlx2b*, are found in the zebrafish genome, with  
126 *dlx2a* predicted to be the ortholog of mammalian *Dlx2*<sup>52</sup>. In mouse, GSX2 promotes *Dlx2*  
127 expression in the ventral telencephalon, while DLX2 in turn represses *Gsx1* and *Gsx2*<sup>51</sup>, and  
128 collectively this promotes ventral identity and mediates proliferative characteristics. Removal of  
129 *Gsx1* or *Gsx2* from a *Dlx1* and *Dlx2* double mutant background rescues some phenotypes  
130 observed, demonstrating that GSX/DLX inter-regulation is required for appropriate forebrain  
131 patterning. Two other *Dlx* genes, *Dlx5* and *Dlx6*, are similarly expressed in the forebrain of mice  
132 and zebrafish<sup>52,53</sup>. The *Dlx* genes coordinately regulate patterning of inhibitory neurons in the  
133 forebrain<sup>52-54</sup>, and importantly, the *DLX*, *FOX*, and other families of forebrain transcription  
134 factor encoding genes are implicated in aberrant neuronal signaling observed in patients with  
135 various neurodevelopmental disorders (NDDs)<sup>1,40,55-58</sup>. As such, it is important to investigate  
136 putative target genes for *Gsx1* and *Gsx2* to better understand their roles across brain regions

137 during vertebrate neurodevelopment. In fact, the zebrafish model provides a tool with which this  
138 can be done rapidly and from the earliest neurodevelopmental time point possible.

139 In this study, we comprehensively resolve the neurodevelopmental expression of *gsx1*  
140 and *gsx2* in the zebrafish brain from early embryonic to late larval stages. Using *gsx1* and *gsx2*  
141 zebrafish mutants made using TALEN, we also demonstrate that *dlx2a*, *dlx2b*, *dlx5a*, and *dlx6a*  
142 are differentially regulated by Gsx1 and Gsx2. We further demonstrate that *forkhead box P2*  
143 (*foxp2*), a gene that is expressed in the mammalian and zebrafish CNS<sup>59,60</sup> and is implicated in  
144 language deficits<sup>58</sup>, is regulated by Gsx2 in the zebrafish telencephalon. These studies are  
145 significant in that they establish novel tools for investigating Gsx1 and Gsx2 function during  
146 neurodevelopment and beyond in zebrafish across CNS regions.

147

## 148 **MATERIALS AND METHODS**

### 149 **Zebrafish husbandry**

150 All aspects of this study were approved by the West Virginia University IACUC. Adult  
151 zebrafish were maintained on a 14h/10h light/dark cycle at water temperature at 28-29°C.  
152 Breeding was performed using 1-liter breeding chambers with dividers (Aquanearing). Embryos  
153 were raised in 90x15mm petri dishes at 28.5°C in E3 media (pH 7.4; 0.005M NaCl, 0.00017M  
154 KCl, 0.00033M CaCl<sub>2</sub>, 0.00033M MgSO<sub>4</sub>·7H<sub>2</sub>O, 1.5mM HEPES) in an incubator operating on a  
155 14h/10h light/dark cycle. Staging of embryos was performed using standard procedures<sup>61</sup>. The  
156 following strain was used: TL (Tupfel long fin).

157

### 158 **Bioinformatics**

159 Gene and protein sequences for all genes were obtained from the NCBI database  
160 (<https://www.ncbi.nlm.nih.gov>; see supplemental table S1 for accession numbers) and aligned  
161 using Clustal Omega (<https://www.ebi.ac.uk/Tools/msa/clustalo/>). Geneious was used to  
162 construct the rooted phylogenetic tree (<https://www.geneious.com/academic/>). The UCSF  
163 Genome Browser (<http://genome.ucsc.edu/>) and Ensembl database  
164 (<http://uswest.ensembl.org/index.html>) were used to evaluate exon and intron structures.

165

### 166 **Identification of zebrafish *gsx1* and *gsx2* mRNA transcripts using RT-PCR**

167 Embryos and larvae obtained from TL crosses were raised to the desired ages (3.5 hpf-

168 120 hpf), euthanized, frozen in liquid nitrogen, and stored at -80°C. Total RNA was extracted  
169 from 30 embryos and larvae at each age using a phenol chloroform extraction method with TRI-  
170 Reagent (Invitrogen). 1µg of total RNA was used with oligoDT to synthesize cDNA libraries  
171 (Superscript II First-Strand Synthesis kit, Invitrogen). 2µg of cDNA was used in 28 cycles of  
172 PCR with PlatinumTaq (Invitrogen) and intron-spanning gene-specific primers (see  
173 supplemental table S2). Amplicons were visualized and imaged using a FluorChemQ imager  
174 (ProteinSimple) on a 2% agarose gel with SYBR Safe DNA gel stain (Invitrogen) and excised  
175 using a blue light transilluminator (Clare Chemical Research). Sanger sequencing was used to  
176 confirm identity with NCBI sequences.

177

### 178 **Whole-mount *in situ* hybridization (WISH)**

179 Embryos and larvae were raised to the desired ages and supplemented with 0.003%  
180 phenylthiourea (PTU) in E3 after 6 hpf to prevent pigmentation. For embryos younger than 48  
181 hpf, chorions were removed by incubating in 50µg/mL Pronase (Sigma) at 28.5°C for 15  
182 minutes. Embryos and larvae were anesthetized and fixed in cold 4% paraformaldehyde (PFA)  
183 overnight at 4°C. Fixed embryos were dehydrated using an increasing methanol wash series in  
184 1xPBS (0%, 50%, 100% vol/vol methanol) and stored at -20°C in 100% MeOH for at least 24  
185 hours and up to one year. The *gsx1*<sup>27</sup> and *dlx2a*<sup>62</sup> probes have been previously reported and were  
186 kind gifts of the Eisen and Karlstrom zebrafish labs. The probes for *gsx2*, *dlx2b*, *dlx5a*, *dlx6a*,  
187 and *foxp2* were designed in our lab. To generate antisense mRNA probes for *gsx2* and *dlx2b*, 1µg  
188 of age-specific total RNA was used with Invitrogen's SuperScript III One-Step RT-PCR kit and  
189 gene-specific primers (see supplemental table S2) to amplify cDNA in 35 cycles of PCR.  
190 Amplicons were separated by 1% agarose gel electrophoresis, extracted using a QIAquick Gel  
191 Extraction kit (Qiagen), and subcloned into a pCR2.1\_TOPO 4.0kb vector (Invitrogen). Sanger  
192 sequencing was used to confirm insert identity and directionality. 5µg of each plasmid was  
193 linearized with EcoR1 (*gsx2*) and Not1 (*dlx2b*) and probes were transcribed *in vitro* using SP6  
194 polymerase (mMESSAGE mMACHINE kit, Ambion). To generate antisense mRNA probes for  
195 *dlx5a*, *dlx6a*, and *foxp2*, 1 µg of age-specific total RNA was used to synthesize cDNA libraries  
196 with oligoDT (Superscript II First-Strand Synthesis kit, Invitrogen). 1µg of cDNA was then used  
197 with gene-specific primers (see supplemental table S2) in 36 cycles of PCR. Amplicons were  
198 visualized using a 1% agarose gel with SYBR Safe DNA gel stain and purified using Qiagen's

199 QIAquick Gel Extraction kit. Probes were transcribed *in vitro* directly from purified amplicons  
200 using T7 polymerase (*dlx5a* and *dlx6a*) and SP6 polymerase (*foxp2*) (mMESSAGE mMACHINE  
201 kit, Ambion). The protocol for colorimetric WISH was adapted from Thisse and Thisse<sup>63</sup> and  
202 performed essentially as in Bergeron *et al.*<sup>28</sup>. Embryos were hybridized with a digoxigenin  
203 (DIG)-tagged antisense mRNA probes detected by an anti-DIG antibody (Roche) and developed  
204 in NBT/BCIP (Roche). Staining was stopped by post-fixation in cold 4% PFA overnight at 4°C.  
205 Stained embryos were cleared in 75% glycerol and stored at 4°C protected from light.

206

### 207 **Fluorescence *in situ* hybridization (FISH)**

208 FISH procedures were performed according to the *In Situ* Hybridization Chain Reaction  
209 v3.0 protocol (Molecular Instruments, Los Angeles, CA)<sup>64</sup>. Embryos were simultaneously  
210 hybridized with *gsx1* and *gsx2* probes (designed by Molecular Instruments) diluted in probe  
211 hybridization buffer overnight at 37°C. Excess probe was washed off the following day using  
212 probe wash buffer. Embryos were incubated for 30 minutes at room temperature in amplification  
213 buffer before adding the provided Alexa hairpins specific to the *gsx1* (Alexa Fluor 488) and *gsx2*  
214 (Alexa Fluor 546) mRNA sequences and incubating overnight at room temperature. Embryos  
215 were washed using 5x SSCT (5x SSC + 0.1% Tween 20) and stored in 5x SSCT at 4°C protected  
216 from light.

217

### 218 **Generation of *gsx1* and *gsx2* TALEN mutants**

219 TALEN were designed using the freely available TALE-NT website that was created and  
220 is maintained by labs at Cornell University<sup>65,66</sup>. TALEN assembly was carried out using the  
221 Golden Gate vector system<sup>66</sup> and separate destination vectors containing a modified FokI  
222 domain<sup>67</sup>. 100pg of *in vitro* transcribed mRNA (mMESSAGE mMACHINE kit, Ambion) was  
223 injected into the cell of each 1-cell stage zebrafish embryo to create G0. TALEN efficacy was  
224 checked by amplifying a 436bp fragment around the *gsx1* target site and a 409bp fragment  
225 around the *gsx2* target site using gene-specific primers (see supplemental table S2), followed by  
226 restriction digest of these amplicons using BtsI and EcoRI enzymes (NEB) respectively.  
227 Disruption of endonuclease cutting as evidenced by the presence of a full-length amplicon was  
228 considered effective, and siblings of these embryos were raised to adulthood and screened by  
229 crossing to wild-type (TL strain) adults to generate F1 offspring with single *gsx1* and *gsx2*



230 mutant alleles. These alleles were sequence confirmed by DNA extraction from a subset of  
231 pooled sibling F1 embryos and PCR using gene-specific primers (see supplemental table S2),  
232 TOPO-TA sub cloning (Invitrogen), DH5 $\alpha$  transformation, and Sanger sequencing of individual  
233 clones. F1 siblings carrying predicted loss of function mutations were raised to adulthood,  
234 genotyped, and crossed together to produce homozygous F2 for each new allele as a first pass  
235 mutant screen. Mutant lines are maintained by continuously crossing carriers to TL to eliminate  
236 possible off-target mutations over time, however, no off-target sites were predicted by TALE-  
237 NT.

238

### 239 **Genotyping for *gsx1* $\Delta$ 11 and *gsx2* $\Delta$ 13a alleles**

240 When genotyping was required to distinguish isolated *gsx1* and *gsx2* alleles, tissue was  
241 dissected from the most posterior end of the tail to use in DNA preparation. Tail tissue was  
242 denatured at 95°C for 10 minutes in DNA lysis buffer (10mM Tris pH 7.5, 50mM KCl, 0.3%  
243 Tween20, 0.3% Triton X, 1mM EDTA) and digested using 2mg/mL proteinase-K (Omega) at  
244 55°C for at least 2h to overnight. Proteinase-K was heat-inactivated at 95°C for 10 minutes  
245 before the DNA was used in a standard DreamTaq (Thermo) PCR reaction with gene-specific  
246 primers (see supplemental table S2). Amplicons were visualized and imaged using a Syngene  
247 NuGenius imager with a blue light transilluminator (Clare Chemical Research) on a 4% agarose  
248 gel with SYBR Safe DNA gel stain. *gsx1* $\Delta$ 11 wild-type individuals have one band (140bp),  
249 mutants have one band (129bp), and heterozygotes have two bands at both sizes. *gsx2* $\Delta$ 13a wild-  
250 type individuals have one band (134bp), mutants have one band (121bp), and heterozygotes have  
251 two bands at both sizes.

252

### 253 ***in silico* analyses and expression quantification**

254 Sequences for *dlx2a*, *dlx2b*, *dlx5a*, *dlx6a*, and *foxp2* were identified in the NCBI database  
255 (see supplemental table S1 for accession numbers). The 25kb region upstream of the 5' UTR of  
256 each gene was collected using Ensembl (<https://useast.ensembl.org/index.html>) and entered into  
257 ApE (<http://jorgensen.biology.utah.edu/wayned/apE/>). Assuming conservation of the GSX1<sup>24</sup> and  
258 GSX2<sup>29</sup> enhancer sequences identified in mouse, a 25kb region upstream of each gene 5'UTR  
259 was scanned for enhancer sequence variants. Annotated gene body schematics for the *Dlx2*  
260 orthologs were designed in Inkscape (<https://inkscape.org/>) and drawn using sequence

261 information from Ensembl and ApE. Gene expression area was measured using FIJI-ImageJ by  
262 tracing the area of staining in the diencephalon or telencephalon. The telencephalon area was  
263 measured and used as a proxy for head size to correct for embryo size differences.

264

### 265 **Quantification of *dlx2a* and *dlx2b* expression using RT-qPCR**

266 Embryos derived from heterozygous *gsx1* $\Delta$ *11* and/or *gsx2* $\Delta$ *13a* adults were euthanized  
267 and dissected at 30 hpf in cold RNAlater (Sigma) chilled by housing a 60x15mm petri dish on  
268 ice. A dissection anterior to the spinal cord was made to separate the head from the tail. Heads  
269 were stored in RNAlater at 4°C for up to one month and tails were used for DNA extraction and  
270 genotyping as previously described. 10-12 embryo heads of the same genotype were combined in  
271 a single 1.5mL snap tube and total RNA was extracted using a phenol chloroform extraction  
272 method with TRI-Reagent. 0.5 $\mu$ g of total RNA was used to synthesize cDNA libraries using  
273 oligoDT (Superscript II First-Strand Synthesis kit, Invitrogen). 1 $\mu$ L of cDNA was then used in a  
274 standard SYBR Green (Bio-Rad) qPCR reaction using gene-specific primers for *efla*, *dlx2a*, and  
275 *dlx2b* (see supplemental table S2). Samples were run on a Bio-Rad CFX Connect Real Time  
276 System using Bio-Rad CFX Maestro 1.1 Software. The  $2^{-\Delta\Delta C_t}$  method<sup>68</sup> was used to analyze raw  
277 Ct values and calculate gene expression changes relative to the housekeeping gene *efla*<sup>69</sup>.

278

### 279 **Microscopy and imaging**

280 For WISH, embryos at 12 hpf were imaged at 6.3x on a Zeiss Stereo Discovery V.8  
281 dissecting scope with an Axiocam 105 Color camera and analyzed using the ZEN 2.3 Lite  
282 software. Embryos of the remaining ages (24 hpf-144 hpf) were dissected and mounted in 75%  
283 glycerol under glass coverslips and imaged at 20x on a compound Zeiss Observer.Z1 with an  
284 Axiocam 503 Color camera. Imaging of genotyped samples for mutant studies was done blind by  
285 using a numeric code that could be aligned with genotype afterwards.

286 For FISH, embryos were dissected and mounted in 1x PBS under glass coverslips and  
287 imaged on an Olympus BX61 confocal microscope with Fluoview FV100 software. Imaging  
288 objectives were interchanged depending upon the area being investigated (Olympus UPlanApo,  
289 20x or 40x oil immersion objectives with Olympus Immoil F30CC). Fluorophores used were  
290 Alexa Fluor 488 (*gsx1*) and Alexa Fluor 546 (*gsx2*).

291 For standard length measurements, embryos from heterozygous *gsx1Δ11* adults were  
292 raised and imaged at 4 dpf, 14 dpf, 1 month, 2 months, and 3 months old. Fish were anesthetized  
293 using MS-222, embedded in 1.5% low melt agarose in E3, and imaged next to a ruler on a Zeiss  
294 Stereo Discovery V.8 dissecting scope with an Axiocam 105 Color camera. FIJI-ImageJ was  
295 used to measure standard length<sup>70</sup>.

296 For swim bladder inflation studies, embryos derived from heterozygous *gsx1Δ11* or  
297 *gsx2Δ13a* crosses were raised under standard rearing conditions in 60x15mm petri dishes with  
298 10mL of E3 media at a density of 30 embryos per dish. The number of larvae with and without  
299 inflated swim bladders were counted from days 3-6, and E3 was refreshed daily. Larvae were  
300 imaged on a Zeiss Stereo Discovery V.8 dissecting scope with an Axiocam 105 Color camera.

301

## 302 **Statistics**

303 One-way ANOVAs with multiple comparisons and post hoc Tukey tests at  $\alpha = 0.05$  were  
304 performed in SPSS to evaluate significant differences between genotypes for the *gsx1* growth  
305 study and WISH expression analyses. For RT-qPCR studies, independent two-tailed t-tests at  $\alpha =$   
306 0.05 were performed in SPSS to evaluate significant differences between  $2^{-\Delta\Delta Ct}$  values calculated  
307 from raw Ct values. A Chi-square test (Pearson's test) was performed using GraphPad to  
308 evaluate the association of genotype and swim bladder inflation at  $\alpha = 0.05$ . Outliers for the  
309 growth study and WISH expression analyses were identified using GraphPad (Grubb's test) and  
310 removed.

311

## 312 **RESULTS**

### 313 ***gsx1* and *gsx2* expression in zebrafish embryos and larvae**

314 To assess similarity between the Gsx1 and Gsx2 protein sequences in zebrafish, mouse,  
315 and human, we used a bioinformatics approach. We found that zebrafish Gsx1 shares 57/60  
316 (95%) amino acids in the homeodomain with human and mouse GSX1 (Fig 1A). Zebrafish Gsx1  
317 also shares 57/60 (93%) amino acids in the homeodomain with zebrafish, mouse, and human  
318 Gsx2. Interestingly, the homeodomain sequence is 100% identical between zebrafish, mouse,  
319 and human Gsx2. A rooted phylogenetic tree containing published Gsx1 and Gsx2 protein  
320 sequences reveals that zebrafish Gsx1 and Gsx2 cluster with their mammalian orthologs and also  
321 displays evolutionary divergence from *Drosophila* ortholog Ind (Fig 1B).

322 To document the neurodevelopmental time-course of *gsx1* and *gsx2* expression in  
323 zebrafish, we extracted total RNA from zebrafish embryos and larvae for use in RT-PCR (Fig  
324 1C). *gsx1* expression was identified at 10 hours post fertilization (hpf), consistent with a previous  
325 report<sup>27</sup>, and persisted through our latest time point tested, 120 hpf (Fig 1D). Expression of  
326 zebrafish *gsx2* was first detected at 12 hpf and also persisted through 120 hpf. Interestingly, *gsx1*  
327 expression was observed at 3.5 hpf, suggestive of maternal contributions of *gsx1* to early  
328 embryonic development. However, analysis of maternal zygotic *gsx1* TALEN-generated mutants  
329 obtained through *in vitro* fertilization revealed that *gsx1* is not an essential maternal factor as  
330 maternal zygotic mutants are indistinguishable from zygotic mutants and develop identically  
331 (data provided by request). From these results, we can confirm that zebrafish *gsx1* and *gsx2* are  
332 expressed in zebrafish from embryonic to larval stages, suggesting an importance in early and  
333 later brain development and function.

334

### 335 **Expression of *gsx1* and *gsx2* during early development is complementary yet distinct**

336 Known expression of *gsx1* in zebrafish is limited to select CNS regions beyond 30  
337 hpf<sup>10,27</sup> and expression of zebrafish *gsx2* is minimally reported from 48-72 hpf<sup>30</sup>. Outside of a  
338 transgenic analysis documenting *gsx1* and *gsx2* expression together in the 36-48 hpf spinal  
339 cord<sup>10</sup>, expression of *gsx1* and *gsx2* during neurodevelopment in zebrafish has not been  
340 comprehensively analyzed. We first used whole-mount *in situ* hybridization (WISH) to  
341 characterize and compare *gsx1* and *gsx2* expression in zebrafish embryos and larvae. Consistent  
342 with RT-PCR results, *gsx2* expression was detected at 12 hpf in the presumptive forebrain in the  
343 anterior neural plate (Fig 2H). At 12 hpf *gsx1* is expressed in the presumptive hindbrain in  
344 rhombomere 3 (Fig 2A), consistent with a previous report<sup>27</sup>. From 16-24 hpf *gsx2* expression is  
345 present in the diencephalon and telencephalon (Fig 2I-J), with 24 hpf marking the first  
346 appearance of *gsx2* expression in the caudal hindbrain (Fig 2K). Expression of *gsx2* in the  
347 zebrafish spinal cord is seen clearly in transgenic reporter lines at this time<sup>10</sup>, but we predict  
348 endogenous *gsx2* expression in this region is highly transient and difficult to detect by WISH.  
349 From 16-24 hpf *gsx1* expression is observed in the forebrain, midbrain, hindbrain, and spinal  
350 cord (Fig 2B-C). Conversely, *gsx1* is expressed across the rostral to caudal extent of the  
351 hindbrain at 24 hpf (Fig 2D). *gsx2* expression persists in the diencephalon, telencephalon,  
352 hindbrain, and spinal cord through 30 hpf (Fig 2L-M), and at this age *gsx1* is expressed in the

353 diencephalon, midbrain, hindbrain, and spinal cord (Fig 2E-F). Dorsal views at this age reveal  
354 that *gsx1* and *gsx2* exist in two dorsolateral columns in the hindbrain (Fig 2O and S).

355 Our observed *gsx1* expression through 30 hpf confirms previous findings<sup>27</sup>, however we  
356 continued characterizing *gsx1* expression through late embryonic and larval development along  
357 with *gsx2*. By 48 hpf, *gsx2* expression is restricted to the olfactory bulb, preoptic area,  
358 hypothalamus, pallium, and hindbrain (Fig 2N, 2U-V). At this age, *gsx1* expression is seen in the  
359 preoptic region, hypothalamus, pretectum, optic tectum, cerebellar plate, hindbrain, and spinal  
360 cord (Fig 2G, 2Q-R). At 72 hpf *gsx2* expression is faintly present in the pallium and olfactory  
361 bulb (Fig 3J-K), while *gsx1* expression persists in the pretectum, optic tectum, hypothalamus,  
362 and hindbrain (Fig 3A-C). Expression of *gsx2* through 4-5 days post fertilization (dpf) persists  
363 faintly in the pallium and hindbrain (Fig 3L-O), however *gsx1* expression strongly persists in the  
364 pretectum, optic tectum, hypothalamus, and hindbrain (Fig 3D-I). Collectively, these WISH  
365 analyses provide insight to the dynamic expression patterns of *gsx1* and *gsx2* during embryonic  
366 and larval stages in zebrafish.

367

### 368 **Co-localization of *gsx1* and *gsx2* is minimal**

369 To be more precise in assessing co-localization of *gsx1* and *gsx2* in cells, we turned to  
370 fluorescence *in situ* hybridization (FISH) at embryonic and larval stages. At 24 hpf *gsx1* and  
371 *gsx2* are regionally co-expressed at the border of the dorsal diencephalon and ventral  
372 telencephalon (Fig 4A<sup>i-iii</sup> and 4B<sup>i-iii</sup>; max z-projections), however they very minimally co-localize  
373 in the same cells (insets in Fig 4A<sup>iii</sup> and 4B<sup>iii</sup>; single z-stack plane). At this age *gsx1* and *gsx2* are  
374 also regionally co-expressed in the hindbrain, with *gsx2* expressed dorsal to *gsx1* (Fig 4A<sup>iv-vi</sup>,  
375 4B<sup>iv-vi</sup>). At 30 hpf, *gsx1* and *gsx2* are regionally co-expressed in the ventral diencephalon (Fig  
376 4C<sup>i-iii</sup> and 4D<sup>i-iii</sup>; max z-projections), however rarely co-localize in the same cells (insets in Fig  
377 4C<sup>iii</sup> and 4D<sup>iii</sup>; single z-stack plane). In the hindbrain at this age *gsx1* and *gsx2* remain segregated  
378 dorsoventrally (Figs 4C<sup>iv-vi</sup> and 4D<sup>iv-vi</sup>; max z-projections) and rarely co-localize in the same  
379 cells (inset in Fig 4D<sup>vi</sup>; single z-stack plane).

380 By 48 hpf *gsx1* and *gsx2* are regionally co-expressed in the hypothalamus and preoptic  
381 area (Fig 5A<sup>i-iii</sup> and 5B<sup>i-iii</sup>; max z-projections), however rarely co-localize in the same cells  
382 (insets in Fig 5A<sup>iii</sup> and 5B<sup>iii</sup>; single z-stack plane). Distinct segregation of *gsx1* ventrally and *gsx2*  
383 dorsally in the hindbrain is still apparent at 48 hpf (Fig 5A<sup>iv-vi</sup> and 5B<sup>iv-vi</sup>; max z-projections)

384 however they rarely co-localize in the same cells (inset in Fig 5A<sup>vi</sup>; single z-stack plane).  
385 Interestingly, by this age *gsx1* expression appears to extend ventrally while *gsx2* expression  
386 remains isolated dorsally (Fig 5A<sup>iv-vi</sup>, 5B<sup>iv-vi</sup>). This finding is reminiscent of reported roles for  
387 *Gsx2* and *Gsx1* to regulate neuronal progenitor proliferation versus differentiation, respectively<sup>22</sup>,  
388 and we believe this ventral extension represents the outgrowth of projections from maturing  
389 neuronal progenitors. At 72 hpf regional co-expression of *gsx1* and *gsx2* is restricted to the  
390 preoptic area (Fig 5C<sup>i-vi</sup>; max z-projections), however again, co-localization in the same cells is  
391 minimal (Fig 5C<sup>iii</sup>; single z-stack plane).

392 In brains dissected from 6 dpf larvae, we observed *gsx1* and *gsx2* expression patterns that  
393 were not directly apparent through colorimetric WISH analyses. *gsx1* expression appears in  
394 regions reminiscent of our later stage WISH analyses including the pretectum, hypothalamus,  
395 optic tectum, preoptic area, cerebellar plate, and hindbrain (Fig 6A-F, max z-projections). Dorsal  
396 views of the brain confirmed that *gsx2* is expressed in the pallium at this age (Fig 6A-C), and  
397 also revealed distinct expression in the hindbrain not clearly observed through WISH.  
398 Additionally, ventral views of the brain at this age also revealed that *gsx2* is regionally co-  
399 expressed with *gsx1* in the hypothalamus (Fig 6D-F) however they rarely co-localize in the same  
400 cells (Fig 6F; single z-stack plane). Combined, our WISH analyses reveal that *gsx1* and *gsx2*  
401 expression is dynamic throughout neurodevelopment, and FISH demonstrates for the first time  
402 that they largely exist in distinct cellular populations.

403

#### 404 ***gsx1* and *gsx2* TALEN mutants exhibit unique phenotypes**

405 There is limited knowledge about how *Gsx1* and *Gsx2* function across several developing  
406 brain regions where they are expressed in vertebrates and that we report by WISH and FISH in  
407 zebrafish. In mouse, loss of *Gsx1* leads to abnormal hypothalamic-pituitary signaling<sup>41</sup>, and  
408 mutations in *Gsx2* leads to disturbed forebrain morphology<sup>43</sup>. To further examine the roles of  
409 *gsx1* and *gsx2* in neurodevelopment, we generated zebrafish mutants using TALEN (Fig 7A).  
410 For *gsx1*, we generated alleles with an 11 base-pair (bp) deletion (*gsx1Δ11*), 5bp deletion  
411 (*gsx1Δ5*), and 1bp insertion (*gsx1Δp11*). For *gsx2*, we generated alleles with a 13bp deletion  
412 (*gsx2Δ13a* and *gsx2Δ13b*) and 5bp deletion (*gsx2Δ5*). All mutations occur in the first exon of the  
413 zebrafish *gsx1* and *gsx2* genes and should result in premature stop codons and immature  
414 transcripts lacking the homeobox DNA binding domain. Phenotypes observed are thus far

415 consistent with a loss of function across all *gsx1* and *gsx2* alleles.

416 Through assessing our *gsx1* mutant zebrafish, we found that these fish experience stunted  
417 growth starting at 14 dpf. No significant differences in standard length were found across  
418 genotypes in 4 dpf larvae (Fig 7B), however by 14 dpf standard length of *gsx1Δ11*<sup>-/-</sup> larvae was  
419 significantly smaller than *gsx1Δ11*<sup>+/-</sup> siblings (p=0.002). By one month *gsx1Δ11*<sup>-/-</sup> larvae were  
420 significantly smaller than both *gsx1Δ11*<sup>+/+</sup> and *gsx1Δ11*<sup>+/-</sup> siblings (p<0.001 for both), and this  
421 difference persisted through 2 months (p<0.001 for both) and 3 months of age (p<0.001 for  
422 both). These analyses reveal a growth-related phenotype in *gsx1Δ11*<sup>-/-</sup> zebrafish similar to  
423 reports in mouse<sup>41</sup>. However, unlike *Gsx1* mutant mice, our *gsx1* mutant zebrafish survive to  
424 adulthood, allowing investigations of early and later Gsx1 function across brain regions.

425 Embryos derived from heterozygous *gsx2Δ13a* parents are indistinct from *gsx1Δ11*<sup>+/-</sup>  
426 cross embryos (Fig 7C, top). However, *gsx2Δ13a*<sup>-/-</sup> embryos largely fail to inflate their swim  
427 bladders by 6 dpf under standard rearing conditions, preventing their survival. There was a  
428 significant association between swim bladder inflation and genotype in offspring from  
429 *gsx2Δ13a*<sup>+/-</sup> crosses, as less *gsx2Δ13a*<sup>-/-</sup> larvae had inflated swim bladders compared to  
430 *gsx2Δ13a*<sup>+/+</sup> and *gsx2Δ13a*<sup>+/-</sup> larvae (Fig 7C, bottom; X<sup>2</sup>=22.8, p<0.001). Swim bladder  
431 inflation did not differ between genotypes in *gsx1Δ11*<sup>+/-</sup> crosses (X<sup>2</sup>=.32, p=.851). These results  
432 demonstrate that swim bladder inflation failure is a result of a mutation in *gsx2*, and supports the  
433 important developmental role for Gsx2 in vertebrates, including zebrafish.

434

### 435 **Gsx1 and Gsx2 differentially regulate *distal-less homeobox 2a* and *2b***

436 Enhancer sequences have been reported for murine GSX1<sup>24</sup> and GSX2<sup>29</sup>, and previous  
437 studies report *Distal-less homeobox 2* (*Dlx2*) as a target gene of GSX1 and GSX2 in the mouse  
438 forebrain<sup>51</sup>. *Dlx2* expression overlaps with *Gsx1* and *Gsx2* in the medial, caudal, and lateral  
439 ganglionic eminences (MGE, CGE, and LGE, respectively) of the mouse telencephalon where  
440 they coordinately regulate early neuronal progenitor patterning<sup>40,71,72</sup>. This work shows that  
441 GSX1 and GSX2 upregulate *Dlx2*<sup>51</sup>. Therefore, we sought to determine if the zebrafish ortholog  
442 *dlx2a* or its paralog *dlx2b* are Gsx1 and Gsx2 target genes. Published gene sequences for human,  
443 mouse, and zebrafish *Dlx2* were analyzed *in silico* for Gsx1 and Gsx2 enhancer sequences,  
444 which we assume are conserved in zebrafish. We found that human *DLX2*, mouse *Dlx2*, and  
445 zebrafish *dlx2b* possess putative Gsx1 and Gsx2 enhancer sequences upstream of their 5'UTRs

446 (Fig 8A). Human *DLX2* and zebrafish *dlx2b* possess a putative enhancer sequence that both Gsx1  
447 and Gsx2 could bind. Zebrafish *dlx2a* possesses putative Gsx2 enhancer sequences only.

448 To determine if Gsx1 or Gsx2 regulate *dlx2a* and/or *dlx2b* in zebrafish, we quantified  
449 *dlx2a* and *dlx2b* gene expression area in 30 hpf embryos yielded from *gsx1Δ11+/-;gsx2Δ13a+/-*  
450 crosses using WISH and RT-qPCR. We found that *dlx2a* expression is not significantly different  
451 between *gsx1Δ11+/+;gsx2Δ13a+/+* and *gsx1Δ11-/-;gsx2Δ13a+/+* embryos (Fig 8B<sup>I-II</sup>), however  
452 is significantly reduced in both *gsx1Δ11+/+;gsx2Δ13-/-* and *gsx1Δ11-/-;gsx2Δ13a-/-* embryos in  
453 the diencephalon ( $p < 0.001$  for both) and telencephalon ( $p < 0.001$  for both; Fig 8B<sup>III-IV</sup> and  
454 graphs). Expression of *dlx2b* is not different between *gsx1Δ11+/+;gsx2Δ13a+/+* and *gsx1Δ11-/-*  
455 *;gsx2Δ13a+/+* embryos (Fig 8B<sup>I-II</sup>), however is significantly reduced in both  
456 *gsx1Δ11+/+;gsx2Δ13-/-* and *gsx1Δ11-/-;gsx2Δ13a-/-* embryos in the diencephalon ( $p < 0.001$  for  
457 both) and telencephalon ( $p < 0.001$  for both; Fig 8B<sup>III-IV</sup> and graphs).

458 Consistent with WISH, RT-qPCR revealed that *dlx2b* expression is significantly reduced  
459 in *gsx1Δ11+/+;gsx2Δ13a-/-* and *gsx1Δ11-/-;gsx2Δ13a-/-* embryos compared to wild-types  
460 ( $p = 0.005$  and  $0.002$ , respectively; Fig 8D). Furthermore, we also observed that *dlx2b* expression  
461 is significantly reduced in *gsx1Δ11-/-;gsx2Δ13a-/-* embryos compared to *gsx1Δ11+/+;gsx2Δ13a-*  
462 *-/-* embryos ( $p = 0.012$ ), suggesting that Gsx1 partially sustains *dlx2b* expression which becomes  
463 further reduced upon loss of both *gsx1* and *gsx2*. Unlike WISH, RT-qPCR showed that *dlx2a*  
464 expression is only significantly reduced in *gsx1Δ11-/-;gsx2Δ13a-/-* embryos ( $p < 0.001$ ) and not  
465 in *gsx1Δ11+/+;gsx2Δ13a-/-* embryos ( $p = 0.225$ ; Fig 8D). WISH shows that in  
466 *gsx1Δ11+/+;gsx2Δ13a-/-* embryos, *dlx2a* and *dlx2b* expression is lost in the telencephalon, where  
467 *gsx2* is expressed, yet sustained in the diencephalon, where *gsx1* is expressed. This suggests that  
468 zebrafish Gsx1 and Gsx2 differentially regulate *dlx2a* and *dlx2b* expression in the telencephalon  
469 and diencephalon and that visible changes in *dlx2a* expression cannot be detected by RT-qPCR  
470 of whole brains at 30 hpf.

471

### 472 **Gsx1 and Gsx2 differentially regulate *dlx5a*, *dlx6a*, and *foxp2***

473 To identify additional Gsx1 and Gsx2 target genes in the zebrafish forebrain, we applied  
474 our *in silico* and WISH approaches to assess regulation of *dlx5a* and *dlx6a*, which are closely  
475 related to *dlx2a* and *dlx2b*. Both *dlx5a* and *dlx6a* are expressed in overlapping patterns with  
476 *dlx2a* and *dlx2b* in the zebrafish forebrain<sup>52,57</sup> and coordinately regulate inhibitory neuron



477 patterning in subpallial regions with the other *dlx* orthologs<sup>73</sup>. Published gene sequences for  
478 zebrafish *dlx5a* and *dlx6a* were analyzed *in silico* for putative Gsx1 and Gsx2 enhancer  
479 sequences. Zebrafish *dlx5a* possesses both Gsx1 and Gsx2 enhancer sequences in the 25kb  
480 region upstream of the 5'UTR, while zebrafish *dlx6a* only possesses Gsx2 enhancers (Fig S1A).

481 To determine if Gsx1 or Gsx2 regulate *dlx5a* and *dlx6a* in the zebrafish forebrain, we  
482 again quantified gene expression area in 30 hpf embryos yielded from *gsx1Δ11+/-;gsx2Δ13+/-*  
483 crosses. We found that *dlx5a* is significantly reduced in both *gsx1Δ11+/-;gsx2Δ13-/-* and  
484 *gsx1Δ11-/-;gsx2Δ13a-/-* embryos in the telencephalon ( $p < 0.001$ ), however only significantly  
485 reduced in *gsx1Δ11-/-;gsx2Δ13a-/-* embryos in the diencephalon ( $p < 0.001$ , Fig S1B<sup>i-iv</sup>, S1C).  
486 These results suggest that in the telencephalon, *dlx5a* is regulated by Gsx2, however in the  
487 diencephalon both Gsx1 and Gsx2 are required for normal expression. For *dlx6a*, we observed  
488 significant reductions in expression in in both *gsx1Δ11+/-;gsx2Δ13-/-* and *gsx1Δ11-/-;gsx2Δ13a-/-*  
489 *-/-* embryos in the telencephalon only ( $p < 0.001$ , Fig S1D<sup>i-iv</sup>, S1E). These results suggest that  
490 Gsx2 is the main regulator of *dlx6a* in the telencephalon, and in the diencephalon neither Gsx1  
491 nor Gsx2 are essential for *dlx6a* expression.

492 We also assessed whether Gsx1 or Gsx2 regulate expression of *forkhead box P2 (foxp2)*  
493 in zebrafish. *foxp2* is a gene belonging to the Forkhead domain transcription factors, which are  
494 an evolutionarily conserved group of proteins that have roles in early developmental patterning<sup>74</sup>.  
495 In humans, *FOXP2* is critical for speech and language development<sup>58</sup>; mutations in *FOXP2* lead  
496 to poor linguistic and grammatical skill development and abnormal control of facial  
497 movements<sup>75</sup>. *foxp2* is expressed in the nervous system in zebrafish in many overlapping brain  
498 regions which we report *gsx1* and *gsx2* expression in, including the telencephalon, diencephalon,  
499 optic tectum, hindbrain, and spinal cord<sup>60</sup>. Thus, we were interested in determining if *foxp2* is  
500 regulated by either Gsx1 or Gsx2, particularly in the forebrain. Zebrafish *foxp2* possesses  
501 putative Gsx1 and Gsx2 enhancers, as well as a putative enhancer sequence that both Gsx1 and  
502 Gsx2 could bind to (Fig S1A). Although *foxp2* expression was not statistically different amongst  
503 genotypes ( $p = 0.312$ , Fig S1F<sup>i-iv</sup>, S1G), it is reduced to some degree in *gsx1Δ11+/-;gsx2Δ13-/-*  
504 and *gsx1Δ11-/-;gsx2Δ13a-/-* embryos. This indicates that Gsx2 partially regulates *foxp2*  
505 expression in the telencephalon specifically at this age.

506

507 **DISCUSSION**

508 ***gsx1* and *gsx2* expression during neurodevelopment in zebrafish embryos and larvae**

509 In this study, we comprehensively document *gsx1* and *gsx2* expression in embryonic and  
510 larval zebrafish using multiple strategies, and our analysis presents a time-course for their co-  
511 expression during neurodevelopment. In embryonic and larval stages in zebrafish, *gsx1* is  
512 expressed in the diencephalon, hypothalamus, preoptic region, hindbrain, cerebellar plate, spinal  
513 cord, optic tectum, and pretectum. Across these ages *gsx2* is expressed in the telencephalon,  
514 hypothalamus, pallium, olfactory bulb, and hindbrain. These patterns are largely consistent with  
515 expression of *Gsx1* and *Gsx2* in mouse<sup>24,29</sup>, medaka<sup>26</sup>, *Xenopus*<sup>25</sup>, and previous reports in  
516 zebrafish<sup>10,27,30</sup> with minor exceptions. In *Xenopus*, *Gsx2* is first detected slightly earlier than  
517 *Gsx1*, however we report in zebrafish that *gsx1* is expressed at 10 hpf slightly earlier than *gsx2* at  
518 12 hpf. Furthermore, we report that *gsx2* and not *gsx1* is expressed in the olfactory bulb in  
519 zebrafish, however in *Xenopus* *Gsx1* and not *Gsx2* is expressed in this region.

520 Prior to our study, a comprehensive knowledge of the unique and overlapping roles for  
521 *Gsx1* and *Gsx2* across the vertebrate brain was not attainable due to the lack of gene expression  
522 data. FISH revealed that regional co-expression of *gsx1* and *gsx2* occurs in the hindbrain,  
523 hypothalamus, and preoptic area in zebrafish, however they rarely co-localize in the same cells.  
524 In the hindbrain *gsx1* and *gsx2* exist in two adjacent dorsolateral columns, with *gsx2* dorsal to  
525 *gsx1*, consistent with previous reports and their roles in dorsoventral patterning<sup>24,25</sup>. In mouse,  
526 *Gsx1* regulates cerebellar neuronal progenitor identity through a temporally-regulated  
527 BMP/SMAD signaling gradient<sup>46,47</sup>, and in zebrafish *gsx2* is reported to specify neuronal fate in  
528 the inferior olivary nuclei of the medulla<sup>30</sup>. Outside of these studies the coordinate roles for *Gsx1*  
529 and *Gsx2* in the hindbrain remain under studied. Our findings demonstrate that expression of  
530 *gsx1* and *gsx2* remain distinct from each other dorsoventrally, and starting at 48 hpf expression  
531 of *gsx1* begins to extend ventrally while *gsx2* is restricted dorsally. These patterns may represent  
532 the outgrowth of axons from maturing neuronal progenitors, which would agree with previously  
533 reported roles for *Gsx2* and *Gsx1* in regulating progenitor proliferation and differentiation,  
534 respectively<sup>22</sup>. Thus, this work provides an essential foundation for future studies to interrogate  
535 the functional roles of *Gsx1* and *Gsx2* in the hindbrain.

536 *gsx1* expression in the hypothalamus has been shown in medaka, *Xenopus*, mice, and  
537 zebrafish<sup>24-27,41</sup>, however no roles for *gsx2* in the hypothalamus have been reported. We show  
538 that *gsx1* and *gsx2* are regionally co-expressed in the hypothalamus in zebrafish, which

539 necessitates further studies of *Gsx2* function in this region. Zebrafish *gsx2* expression in the  
540 hypothalamus begins between 24-30 hpf (Fig 2J, 2L), slightly earlier than the onset of *gsx1* in  
541 this region between 30-48 hpf (Fig 2E, 2G). Expression of both *gsx1* and *gsx2* is sustained in the  
542 hypothalamus through 6 dpf (Fig 6). Functions for *Gsx1* and *Gsx2* in this region in zebrafish  
543 could be similar to reports in mouse forebrain showing that *Gsx2* maintains neuronal progenitor  
544 pools and *Gsx1* drives neuronal differentiation<sup>22</sup>. Interestingly, one single-cell sequencing report  
545 conducted in the adult (1-2 year) zebrafish hypothalamus reported *Gsx1* as a transcription factor  
546 significantly associated with 13 genes categorized as either neuropeptide, neurotransmitter, ion  
547 channel, or synaptic genes<sup>76</sup>. Identification of *Gsx1* as an important regulatory factor in the  
548 mature zebrafish hypothalamus suggests prolonged requirements for *Gsx1* in hypothalamic  
549 function. As our *gsx1* mutant zebrafish survive through adulthood, roles for *Gsx1* in the  
550 development and function of the hypothalamus along with associated growth, behavioral, and  
551 metabolic changes can be investigated in the future.

552

### 553 **Mutations in *gsx1* and *gsx2* in zebrafish disturbs early growth and development**

554 We observed a reduced growth phenotype in *gsx1* mutant zebrafish through adulthood.  
555 These studies provide a detailed description of the onset of significant growth deficits as well as  
556 the basic trend and continuation of these deficits. We observed that significant deficits were not  
557 present at 4 dpf, but appeared by 14 dpf, allowing us to determine the relative window under  
558 which these deficits begin. This data is consistent with work in *Gsx1* mutant mice, which were  
559 the same size as their wild-type siblings at birth but began to show growth deficits as  
560 development progressed<sup>41</sup>. Unlike *Gsx1* mutant mice, our *gsx1* mutant zebrafish survive to  
561 adulthood, permitting investigations of later *Gsx1* function. The premature death of *Gsx1* mutant  
562 mice is largely attributed to defects in forebrain neurogenesis and disruptions in ascending  
563 cortical interneuron migration<sup>22,44,51</sup>, thus continued examination of the impact of mutations in  
564 *gsx1* in zebrafish will further elucidate its important neurodevelopmental and later roles in  
565 vertebrates.

566 We have additionally identified a unique swim bladder inflation failure phenotype in *gsx2*  
567 mutant zebrafish that prevents their survival under standard rearing conditions, supporting the  
568 critical role for *Gsx2* in growth and development amongst vertebrates. *Gsx2* mutant mice fail to  
569 survive more than a day following birth, however also exhibit severely disrupted forebrain and

570 hindbrain morphology. Comprehensive knowledge of GSX1 and GSX2 function together and  
571 separately is minimal outside of the mouse forebrain<sup>34,44,51</sup> and few reports in the  
572 cerebellum<sup>30,46,77</sup> and spinal cord<sup>7,10,48</sup>. As such, analysis of Gsx1 and Gsx2 function in our  
573 zebrafish mutants in these and other CNS regions can supplement these reports.

574

### 575 **Identifying Gsx1 and Gsx2 target genes in the zebrafish forebrain**

576 We demonstrated differential regulation of *dlx2a*, *dlx2b*, *dlx5a*, *dlx6a*, and *foxp2* by Gsx1  
577 and Gsx2 in the forebrain of our *gsx1* and *gsx2* mutant zebrafish. A complex relationship  
578 between the *Gsx* and *Dlx* genes has been reported in the mouse forebrain<sup>51</sup> that facilitates  
579 regulation of a major transcriptional control program dictating the expression of diverse target  
580 genes. The *Dlx* pathways in the forebrain also serve to regulate the differentiation of inhibitory  
581 projection neurons and interneurons that migrate to mature regions like the cortex and olfactory  
582 bulb<sup>53-55</sup>. Conservation of the Gsx/Dlx regulatory network in zebrafish is significant in that it  
583 establishes initial understanding of Gsx function in neurodevelopment in zebrafish. Our  
584 embryonic and larval stage whole brain expression analyses also justify continued investigations  
585 of Gsx function together and separately across brain regions to add to our knowledge of their role  
586 in neurodevelopment across vertebrates.

587 Our data suggests that in zebrafish, Gsx2 is largely responsible for regulating expression  
588 of *dlx2a* and *dlx2b*. Through WISH we identified significant reductions in *dlx2a* and *dlx2b*  
589 expression in the telencephalon of *gsx1Δ11+/+;gsx2Δ13a-/-* and *gsx1Δ11-/-;gsx2Δ13a-/-*  
590 embryos (Fig 8). In the diencephalon, *dlx2a* expression was reduced in both  
591 *gsx1Δ11+/+;gsx2Δ13a-/-* and *gsx1Δ11-/-;gsx2Δ13a-/-* embryos, however *dlx2b* expression was  
592 only reduced in *gsx1Δ11-/-;gsx2Δ13a-/-* embryos, suggesting that Gsx1 may be compensating  
593 for Gsx2 and sustaining *dlx2b* expression in the diencephalon specifically. RT-qPCR analysis of  
594 *dlx2b* expression was consistent with these results, revealing significant reductions in  
595 *gsx1Δ11+/+;gsx2Δ13a-/-* embryos and more significant reductions in *gsx1Δ11-/-;gsx2Δ13a-/-*  
596 embryos. Unlike our WISH analysis, RT-qPCR shows that *dlx2a* expression is only significantly  
597 reduced in *gsx1Δ11-/-;gsx2Δ13a-/-* embryos and not *gsx1Δ11+/+;gsx2Δ13-/-* embryos. One  
598 potential explanation for this variability is the pattern in which *dlx2a* expression is reduced by  
599 WISH. In *gsx1Δ11-/-;gsx2Δ13a-/-* embryos, *dlx2a* expression is lost in the telencephalon, where  
600 *gsx2* is expressed, however not in the diencephalon, where *gsx1* is expressed. This variability

601 could also be related to alternative transcript detection through qPCR. However, our *in situ* probe  
602 for *dlx2a* detects a product that overlaps completely with the transcript amplified by our *dlx2a*  
603 qPCR primers, and we predict these targets are identical for both *dlx2a* splice variants that exist  
604 in zebrafish.

605 Expression of zebrafish *dlx5a* is largely regulated by Gsx2 in the telencephalon, as we  
606 identified significant reductions in *gsx1Δ11+/+;gsx2Δ13a/-* and *gsx1Δ11-/-;gsx1Δ11-/-* embryos  
607 (Fig S1B, S1C). However, in the diencephalon it appears that both Gsx1 and Gsx2 regulate *dlx5a*  
608 expression, as significant reductions were only identified in *gsx1Δ11-/-;gsx2Δ13-/-* embryos. In  
609 turn, this suggests that Gsx1 is in part compensating for loss of Gsx2 function in  
610 *gsx1Δ11+/+;gsx2Δ13a/-* embryos, which were not significantly reduced compared to wild-types.  
611 Interestingly, expression of *dlx6a* appears to be regulated most strongly by Gsx2 in the  
612 telencephalon only, agreeing with initial predictions based on enhancer sequence presence (Fig  
613 S1A, S1D, S1E). Collectively, these results demonstrate that a complex relationship between the  
614 *gsx* and *dlx* genes exists in zebrafish that is reminiscent of reports in other vertebrates<sup>51</sup>. Future  
615 studies will focus on confirming more Gsx1 and Gsx2 target genes in zebrafish in order to  
616 elucidate their unique and overlapping roles during CNS development.

617 Outside of confirming that several *dlx* orthologs are regulated by Gsx1 and Gsx2 in the  
618 zebrafish forebrain, we also found that although not statistically significant, *foxp2* is weakly  
619 regulated in the telencephalon by Gsx2. It is important to note that this study was conducted at  
620 30 hpf only, and *foxp2* expression begins in zebrafish as early as 10 hpf in the presumptive  
621 forebrain<sup>60</sup> and is documented through 3 months of age<sup>78</sup>. The onset of *foxp2* expression is  
622 similar to the onset of *gsx2* in the presumptive forebrain at 12 hpf (Fig 2H), however during  
623 neurodevelopment *foxp2* is expressed in several overlapping regions with the *gsx* genes, such as  
624 the optic tectum, hindbrain, and spinal cord. Minimal regulation by Gsx2 in the telencephalon is  
625 consistent with a requirement for Gsx2 in early forebrain patterning observed throughout these  
626 experiments, particularly in the telencephalon. It is interesting to note that expression of *foxp2*  
627 and *dlx6a* minimally overlaps in dorsal subpallial regions in zebrafish<sup>60</sup>, and *dlx6a* is regulated  
628 by Gsx2 in this dorsal telencephalic region only. Collectively, our approaches for identifying and  
629 validating target genes for Gsx1 and Gsx2 during neurodevelopment provide a new *in vivo*  
630 model for gaining even greater insight into regulatory roles of these and other transcription  
631 factors across CNS gene networks.

632 **REFERENCES**

- 633 1. Wigle JT, Eisenstat DD. Homeobox genes in vertebrate forebrain development and disease.  
634 *Clin Genet.* 2008;73(3):212-226. doi:10.1111/j.1399-0004.2008.00967.x
- 635 2. Guillemot F. Spatial and temporal specification of neural fates by transcription factor codes.  
636 *Development.* 2007;134(21):3771-3780. doi:10.1242/dev.006379
- 637 3. Jessell TM. Neuronal specification in the spinal cord: inductive signals and transcriptional  
638 codes. *Nat Rev Genet.* 2000;1(1):20-29. doi:10.1038/35049541
- 639 4. Graba Y, Aragnol D, Pradel J. Drosophila Hox complex downstream targets and the  
640 function of homeotic genes. *Bioessays.* 1997;19(5):379-388. doi:10.1002/bies.950190505
- 641 5. Carroll SB. Homeotic genes and the evolution of arthropods and chordates. *Nature.*  
642 1995;376(6540):479-485. doi:10.1038/376479a0
- 643 6. Jacob J, Storm R, Castro DS, et al. Insm1 (IA-1) is an essential component of the regulatory  
644 network that specifies monoaminergic neuronal phenotypes in the vertebrate hindbrain.  
645 *Development.* 2009;136(14):2477-2485. doi:10.1242/dev.034546
- 646 7. Mizuguchi R, Kriks S, Cordes R, Gossler A, Ma Q, Goulding M. Ascl1 and Gsh1/2 control  
647 inhibitory and excitatory cell fate in spinal sensory interneurons. *Nat Neurosci.*  
648 2006;9(6):770-778. doi:10.1038/nn1706
- 649 8. Briscoe J, Sussel L, Serup P, et al. Homeobox gene Nkx2.2 and specification of neuronal  
650 identity by graded Sonic hedgehog signalling. *Nature.* 1999;398(6728):622-627.  
651 doi:10.1038/19315
- 652 9. Briscoe J, Pierani A, Jessell TM, Ericson J. A Homeodomain Protein Code Specifies  
653 Progenitor Cell Identity and Neuronal Fate in the Ventral Neural Tube. *Cell.*  
654 2000;101(4):435-445. doi:10.1016/S0092-8674(00)80853-3
- 655 10. Satou C, Kimura Y, Hirata H, Suster ML, Kawakami K, Higashijima S. Transgenic tools to  
656 characterize neuronal properties of discrete populations of zebrafish neurons. *Development.*  
657 2013;140(18):3927-3931. doi:10.1242/dev.099531
- 658 11. Kinkhabwala A, Riley M, Koyama M, et al. A structural and functional ground plan for  
659 neurons in the hindbrain of zebrafish. *PNAS.* 2011;108(3):1164-1169.  
660 doi:10.1073/pnas.1012185108
- 661 12. Higashijima S-I, Schaefer M, Fetcho JR. Neurotransmitter properties of spinal interneurons  
662 in embryonic and larval zebrafish. *J Comp Neurol.* 2004;480(1):19-37.  
663 doi:10.1002/cne.20279
- 664 13. Singh G, Kaur S, Stock JL, et al. Identification of 10 murine homeobox genes. *PNAS.*  
665 1991;88(23):10706-10710. doi:10.1073/pnas.88.23.10706

- 666 14. Duverger O, Morasso MI. Role of homeobox genes in the patterning, specification, and  
667 differentiation of ectodermal appendages in mammals. *J Cell Phys.* 2008;216(2):337-346.  
668 doi:10.1002/jcp.21491
- 669 15. McGinnis W, Krumlauf R. Homeobox genes and axial patterning. *Cell.* 1992;68(2):283-  
670 302. doi:10.1016/0092-8674(92)90471-N
- 671 16. Keynes R, Krumlauf R. Hox genes and regionalization of the nervous system. *Annu Rev*  
672 *Neurosci.* 1994;17:109-132. doi:10.1146/annurev.ne.17.030194.000545
- 673 17. Gehring WJ. The homeobox: structural and evolutionary aspects. In: *Molecular Approaches*  
674 *to Developmental Biology.* Vol 1. 1st ed. Alan R. Liss Inc.; 1987:115-129.
- 675 18. Lewis EB. A gene complex controlling segmentation in *Drosophila*. *Nature.*  
676 1978;276(5688):565-570. doi:10.1038/276565a0
- 677 19. Brooke NM, Garcia-Fernández J, Holland PWH. The ParaHox gene cluster is an  
678 evolutionary sister of the Hox gene cluster. *Nature.* 1998;392(6679):920-922.  
679 doi:10.1038/31933
- 680 20. Weiss JB, Von Ohlen T, Mellerick DM, Dressler G, Doe CQ, Scott MP. Dorsoventral  
681 patterning in the *Drosophila* central nervous system: the intermediate neuroblasts defective  
682 homeobox gene specifies intermediate column identity. *Gene Dev.* 1998;12(22):3591-3602.  
683 doi:10.1101/gad.12.22.3591
- 684 21. Yun K, Garel S, Fischman S, Rubenstein JLR. Patterning of the lateral ganglionic eminence  
685 by the Gsh1 and Gsh2 homeobox genes regulates striatal and olfactory bulb histogenesis  
686 and the growth of axons through the basal ganglia. *J Comp Neurol.* 2003;461(2):151-165.  
687 doi:10.1002/cne.10685
- 688 22. Pei Z, Wang B, Chen G, Nagao M, Nakafuku M, Campbell K. Homeobox genes Gsx1 and  
689 Gsx2 differentially regulate telencephalic progenitor maturation. *PNAS.* 2011;108(4):1675-  
690 1680. doi:10.1073/pnas.1008824108
- 691 23. Salomone J, Qin S, Fufa TD, et al. Conserved Gsx2/Ind homeodomain monomer versus  
692 homodimer DNA binding defines regulatory outcomes in flies and mice. *Genes Dev.*  
693 2021;35(1-2):157-174. doi:10.1101/gad.343053.120
- 694 24. Valerius MT, Li H, Stock JL, et al. Gsh-1: A novel murine homeobox gene expressed in the  
695 central nervous system. *Dev Dynam.* 1995;203(3):337-351. doi:10.1002/aja.1002030306
- 696 25. Illes JC, Winterbottom E, Isaacs HV. Cloning and expression analysis of the anterior  
697 parahox genes, Gsh1 and Gsh2 from *Xenopus tropicalis*. *Dev Dynam.* 2009;238(1):194-  
698 203. doi:10.1002/dvdy.21816
- 699 26. Deschet K, Bourrat F, Chourrout D, Joly J-S. Expression domains of the medaka (*Oryzias*  
700 *latipes*) Ol-Gsh 1 gene are reminiscent of those of clustered and orphan homeobox genes.  
701 *Dev Gene Evol.* 1998;208(5):235-244. doi:10.1007/s004270050178

- 702 27. Cheesman SE, Eisen JS. *gsh1* demarcates hypothalamus and intermediate spinal cord in  
703 zebrafish. *Gene Expr Patterns*. 2004;5(1):107-112. doi:10.1016/j.modgep.2004.05.006
- 704 28. Bergeron SA, Carrier N, Li GH, Ahn S, Burgess HA. *Gsx1* expression defines neurons  
705 required for prepulse inhibition. *Mol Psychiatr*. 2015;20(8):974-985.  
706 doi:10.1038/mp.2014.106
- 707 29. Hsieh-Li HM, Witte DP, Szucsik JC, Weinstein M, Li H, Potter SS. *Gsh-2*, a murine  
708 homeobox gene expressed in the developing brain. *Mech Dev*. 1995;50(2-3):177-186.  
709 doi:10.1016/0925-4773(94)00334-j
- 710 30. Itoh T, Takeuchi M, Sakagami M, et al. *Gsx2* is required for specification of neurons in the  
711 inferior olivary nuclei from *Ptf1a*-expressing neural progenitors in zebrafish. *Development*.  
712 2020;147(19). doi:10.1242/dev.190603
- 713 31. Chapman H, Waclaw RR, Pei Z, Nakafuku M, Campbell K. The homeobox gene *Gsx2*  
714 controls the timing of oligodendroglial fate specification in mouse lateral ganglionic  
715 eminence progenitors. *Development*. 2013;140(11):2289-2298. doi:10.1242/dev.091090
- 716 32. Chapman H, Riesenber A, Ehrman LA, et al. *Gsx* transcription factors control neuronal  
717 versus glial specification in ventricular zone progenitors of the mouse lateral ganglionic  
718 eminence. *Dev Biol*. 2018;442(1):115-126. doi:10.1016/j.ydbio.2018.07.005
- 719 33. Qin S, Ware SM, Waclaw RR, Campbell K. Septal contributions to olfactory bulb  
720 interneuron diversity in the embryonic mouse telencephalon: role of the homeobox gene  
721 *Gsx2*. *Neural Dev*. 2017;12(1):13. doi:10.1186/s13064-017-0090-5
- 722 34. Waclaw RR, Wang B, Pei Z, Ehrman LA, Campbell K. Distinct Temporal Requirements  
723 for the Homeobox Gene *Gsx2* in Specifying Striatal and Olfactory Bulb Neuronal Fates.  
724 *Neuron*. 2009;63(4):451-465. doi:10.1016/j.neuron.2009.07.015
- 725 35. Desmaris E, Keruzore M, Saulnier A, et al. *DMRT5*, *DMRT3*, and *EMX2* Cooperatively  
726 Repress *Gsx2* at the Pallium-Subpallium Boundary to Maintain Cortical Identity in Dorsal  
727 Telencephalic Progenitors. *J Neurosci*. 2018;38(42):9105-9121.  
728 doi:10.1523/JNEUROSCI.0375-18.2018
- 729 36. Faedo A, Laporta A, Segnali A, et al. Differentiation of human telencephalic progenitor  
730 cells into MSNs by inducible expression of *Gsx2* and *Ebf1*. *Proc Natl Acad Sci USA*.  
731 2017;114(7):E1234-E1242. doi:10.1073/pnas.1611473114
- 732 37. Roychoudhury K, Salomone J, Qin S, et al. Physical interactions between *Gsx2* and *Ascl1*  
733 balance progenitor expansion versus neurogenesis in the mouse lateral ganglionic  
734 eminence. *Development*. 2020;147(7). doi:10.1242/dev.185348
- 735 38. Kohli V, Nardini D, Ehrman LA, Waclaw RR. Characterization of *Glccl1* expression in a  
736 subpopulation of lateral ganglionic eminence progenitors in the mouse telencephalon. *Dev*  
737 *Dyn*. 2018;247(1):222-228. doi:10.1002/dvdy.24556



- 738 39. Konno D, Kishida C, Maehara K, et al. Dmrt factors determine the positional information  
739 of cerebral cortical progenitors via differential suppression of homeobox genes.  
740 *Development*. 2019;146(15). doi:10.1242/dev.174243
- 741 40. Guo T, Liu G, Du H, et al. Dlx1/2 are Central and Essential Components in the  
742 Transcriptional Code for Generating Olfactory Bulb Interneurons. *Cereb Cortex*.  
743 2019;29(11):4831-4849. doi:10.1093/cercor/bhz018
- 744 41. Li H, Zeitler PS, Valerius MT, Small K, Potter SS. Gsh-1, an orphan Hox gene, is required  
745 for normal pituitary development. *EMBO J*. 1996;15(4):714-724.
- 746 42. Alvarez-Bolado G. Development of neuroendocrine neurons in the mammalian  
747 hypothalamus. *Cell Tissue Res*. 2019;375(1):23-39. doi:10.1007/s00441-018-2859-1
- 748 43. Szucsik JC, Witte DP, Li H, Pixley SK, Small KM, Potter SS. Altered Forebrain and  
749 Hindbrain Development in Mice Mutant for the Gsh-2Homeobox Gene. *Dev Biol*.  
750 1997;191(2):230-242. doi:10.1006/dbio.1997.8733
- 751 44. Toresson H, Campbell K. A role for Gsh1 in the developing striatum and olfactory bulb of  
752 Gsh2 mutant mice. *Development*. 2001;128(23):4769-4780.
- 753 45. Wang B, Waclaw RR, Allen ZJ, Guillemot F, Campbell K. Ascl1 is a required downstream  
754 effector of Gsx gene function in the embryonic mouse telencephalon. *Neural Dev*.  
755 2009;4(1):5. doi:10.1186/1749-8104-4-5
- 756 46. Seto Y, Nakatani T, Masuyama N, et al. Temporal identity transition from Purkinje cell  
757 progenitors to GABAergic interneuron progenitors in the cerebellum. *Nature*  
758 *Communications*. 2014;5(1):3337. doi:10.1038/ncomms4337
- 759 47. Ma TC, Vong KI, Kwan KM. Spatiotemporal Decline of BMP Signaling Activity in Neural  
760 Progenitors Mediates Fate Transition and Safeguards Neurogenesis. *Cell Reports*.  
761 2020;30(11):3616-3624.e4. doi:10.1016/j.celrep.2020.02.089
- 762 48. Patel M, Li Y, Anderson J, et al. Gsx1 promotes locomotor functional recovery after spinal  
763 cord injury. *Mol Ther*. Published online April 23, 2021. doi:10.1016/j.yymthe.2021.04.027
- 764 49. Tabor KM, Smith TS, Brown M, Bergeron SA, Briggman KL, Burgess HA. Presynaptic  
765 Inhibition Selectively Gates Auditory Transmission to the Brainstem Startle Circuit. *Curr*  
766 *Biol*. 2018;28(16):2527-2535.e8. doi:10.1016/j.cub.2018.06.020
- 767 50. Li H, Schrick JJ, Fewell GD, et al. Novel Strategy Yields Candidate Gsh-1 Homeobox  
768 Gene Targets Using Hypothalamus Progenitor Cell Lines. *Dev Biol*. 1999;211(1):64-76.  
769 doi:10.1006/dbio.1999.9304
- 770 51. Wang B, Long JE, Flandin P, et al. Loss of Gsx1 and Gsx2 function rescues distinct  
771 phenotypes in Dlx1/2 mutants. *J Comp Neurol*. 2013;521(7):1561-1584.  
772 doi:10.1002/cne.23242

- 773 52. MacDonald RB, Debiais-Thibaud M, Talbot JC, Ekker M. The relationship between *dlx*  
774 and *gad1* expression indicates highly conserved genetic pathways in the zebrafish forebrain.  
775 *Developmental Dynamics*. 2010;239(8):2298-2306. doi:<https://doi.org/10.1002/dvdy.22365>
- 776 53. Stühmer T, Anderson SA, Ekker M, Rubenstein JLR. Ectopic expression of the *Dlx* genes  
777 induces glutamic acid decarboxylase and *Dlx* expression. :8.
- 778 54. Eisenstat DD, Liu JK, Mione M, et al. *DLX-1*, *DLX-2*, and *DLX-5* expression define  
779 distinct stages of basal forebrain differentiation. *Journal of Comparative Neurology*.  
780 1999;414(2):217-237. doi:[https://doi.org/10.1002/\(SICI\)1096-](https://doi.org/10.1002/(SICI)1096-9861(19991115)414:2<217::AID-CNE6>3.0.CO;2-I)  
781 [9861\(19991115\)414:2<217::AID-CNE6>3.0.CO;2-I](https://doi.org/10.1002/(SICI)1096-9861(19991115)414:2<217::AID-CNE6>3.0.CO;2-I)
- 782 55. Anderson SA. Interneuron Migration from Basal Forebrain to Neocortex: Dependence on  
783 *Dlx* Genes. *Science*. 1997;278(5337):474-476. doi:10.1126/science.278.5337.474
- 784 56. Liu X, Novosedlik N, Wang A, et al. The *DLX1* and *DLX2* genes and susceptibility to  
785 autism spectrum disorders. *Eur J Hum Genet*. 2009;17(2):228-235.  
786 doi:10.1038/ejhg.2008.148
- 787 57. MacDonald RB, Pollack JN, Debiais-Thibaud M, Heude E, Coffin Talbot J, Ekker M. The  
788 *ascl1a* and *dlx* genes have a regulatory role in the development of GABAergic interneurons  
789 in the zebrafish diencephalon. *Dev Biol*. 2013;381(1):276-285.  
790 doi:10.1016/j.ydbio.2013.05.025
- 791 58. Enard W, Przeworski M, Fisher SE, et al. Molecular evolution of *FOXP2*, a gene involved  
792 in speech and language. *Nature*. 2002;418(6900):869-872. doi:10.1038/nature01025
- 793 59. Ferland RJ, Cherry TJ, Preware PO, Morrissey EE, Walsh CA. Characterization of *Foxp2*  
794 and *Foxp1* mRNA and protein in the developing and mature brain. *Journal of Comparative*  
795 *Neurology*. 2003;460(2):266-279. doi:10.1002/cne.10654
- 796 60. Bonkowsky JL, Chien C-B. Molecular cloning and developmental expression of *foxp2* in  
797 zebrafish. *Developmental Dynamics*. 2005;234(3):740-746. doi:10.1002/dvdy.20504
- 798 61. Kimmel CB, Ballard WW, Kimmel SR, Ullmann B, Schilling TF. Stages of embryonic  
799 development of the zebrafish. *Developmental Dynamics*. 1995;203(3):253-310.  
800 doi:10.1002/aja.1002030302
- 801 62. Akimenko MA, Ekker M, Wegner J, Lin W, Westerfield M. Combinatorial expression of  
802 three zebrafish genes related to distal-less: part of a homeobox gene code for the head. *J*  
803 *Neurosci*. 1994;14(6):3475-3486. doi:10.1523/JNEUROSCI.14-06-03475.1994
- 804 63. Thisse C, Thisse B. High-resolution in situ hybridization to whole-mount zebrafish  
805 embryos. *Nat Protoc*. 2008;3(1):59-69. doi:10.1038/nprot.2007.514
- 806 64. Choi HMT, Chang JY, Trinh LA, Padilla JE, Fraser SE, Pierce NA. Programmable in situ  
807 amplification for multiplexed imaging of mRNA expression. *Nature Biotechnology*.  
808 2010;28(11):1208-1212. doi:10.1038/nbt.1692

- 809 65. Doyle EL, Booher NJ, Standage DS, et al. TAL Effector-Nucleotide Targeter (TALE-NT)  
810 2.0: tools for TAL effector design and target prediction. *Nucleic Acids Research*.  
811 2012;40(W1):W117-W122. doi:10.1093/nar/gks608
- 812 66. Cermak T, Doyle EL, Christian M, et al. Efficient design and assembly of custom TALEN  
813 and other TAL effector-based constructs for DNA targeting. *Nucleic Acids Research*.  
814 2011;39(12):e82-e82. doi:10.1093/nar/gkr218
- 815 67. Won M, Ro H, Dawid IB. Lnx2 ubiquitin ligase is essential for exocrine cell differentiation  
816 in the early zebrafish pancreas. *Proc Natl Acad Sci USA*. 2015;112(40):12426-12431.  
817 doi:10.1073/pnas.1517033112
- 818 68. Livak KJ, Schmittgen TD. Analysis of Relative Gene Expression Data Using Real-Time  
819 Quantitative PCR and the  $2^{-\Delta\Delta CT}$  Method. *Methods*. 2001;25(4):402-408.  
820 doi:10.1006/meth.2001.1262
- 821 69. Tang R, Dodd A, Lai D, McNabb WC, Love DR. Validation of Zebrafish (*Danio rerio*)  
822 Reference Genes for Quantitative Real-time RT-PCR Normalization. *Acta Biochim Biophys*  
823 *Sin (Shanghai)*. 2007;39(5):384-390. doi:10.1111/j.1745-7270.2007.00283.x
- 824 70. Parichy DM, Elizondo MR, Mills MG, Gordon TN, Engeszer RE. Normal table of  
825 postembryonic zebrafish development: Staging by externally visible anatomy of the living  
826 fish. *Dev Dynam*. 2009;238(12):2975-3015. doi:10.1002/dvdy.22113
- 827 71. Long JE, Swan C, Liang WS, Cobos I, Potter GB, Rubenstein JLR. Dlx1&2 and Mash1  
828 transcription factors control striatal patterning and differentiation through parallel and  
829 overlapping pathways. *J Comp Neurol*. 2009;512(4):556-572. doi:10.1002/cne.21854
- 830 72. Long JE, Cobos I, Potter GB, Rubenstein JLR. Dlx1&2 and Mash1 Transcription Factors  
831 Control MGE and CGE Patterning and Differentiation through Parallel and Overlapping  
832 Pathways. *Cereb Cortex*. 2009;19(Suppl 1):i96-i106. doi:10.1093/cercor/bhp045
- 833 73. Solek CM, Feng S, Perin S, Weinschutz Mendes H, Ekker M. Lineage tracing of dlx1a/2a  
834 and dlx5a/6a expressing cells in the developing zebrafish brain. *Developmental Biology*.  
835 2017;427(1):131-147. doi:10.1016/j.ydbio.2017.04.019
- 836 74. Carlsson P, Mahlapuu M. Forkhead Transcription Factors: Key Players in Development and  
837 Metabolism. *Developmental Biology*. 2002;250(1):1-23. doi:10.1006/dbio.2002.0780
- 838 75. Vargha-Khadem F, Watkins KE, Price CJ, et al. Neural basis of an inherited speech and  
839 language disorder. *Proceedings of the National Academy of Sciences*. 1998;95(21):12695-  
840 12700. doi:10.1073/pnas.95.21.12695
- 841 76. Shafer MER, Sawh AN, Schier AF. Gene family evolution underlies cell type  
842 diversification in the hypothalamus of teleosts. *bioRxiv*. Published online December 13,  
843 2020:2020.12.13.414557. doi:10.1101/2020.12.13.414557

844 77. Ju J, Liu Q, Zhang Y, et al. Olig2 regulates Purkinje cell generation in the early developing  
845 mouse cerebellum. *Scientific Reports*. 2016;6(1):30711. doi:10.1038/srep30711

846 78. Shah R, Medina-Martinez O, Chu L-F, Samaco RC, Jamrich M. Expression of FoxP2  
847 during zebrafish development and in the adult brain. *Int J Dev Biol*. 2004;50(4):435-438.  
848 doi:10.1387/ijdb.052065rs

849

850

851 **ACKNOWLEDGEMENTS**

852 The authors would like to thank Timothy Driscoll, PhD and Jessica Towey (WVU Dept of  
853 Biology) for advice and equipment training and use related to the RT-qPCR experiments.  
854 Benjamin Feldman, PhD, director of the NICHD Zebrafish Core (NIH), provided guidance early  
855 on related to TALEN mutant generation before CRISPR/Cas9 became all the rage. Eric Horstick,  
856 PhD and Andrew Dacks, PhD (WVU Dept of Biology) carefully read the manuscript and  
857 provided valuable preliminary feedback.

858

859 **FUNDING**

860 This work was supported by WVU and Dept of Biology startup funds and funds from NIH grant  
861 R15HD101974 (NICHD) to SAB. WVU ECAS and Dept of Biology Doctoral Research Funds  
862 supported purchase of Molecular Instruments reagents to RAC. ARA was supported by the  
863 Arnold and Mabel Beckman Foundation through the Beckman Scholars Program.

864

865 **CONTRIBUTIONS TO THE MANUSCRIPT**

866 SAB and RAC designed and performed experiments, wrote and edited the manuscript, analyzed  
867 and interpreted the results; EIS, ZAD, SNP, ARA, LCF, and RLP performed and assisted with  
868 experiments, collected data, and ran initial analyses.

869

870

871 **FIGURE LEGENDS**

872

873 **Fig 1. Gsx1 and Gsx2 are conserved across vertebrates and expressed in zebrafish from**  
874 **embryonic stages through adulthood. A)** Amino acid sequence alignment of zebrafish, mouse,  
875 and human Gsx1 and Gsx2. Dr, *Danio rerio*; Mm, *Mus musculus*; Hs, *Homo sapiens*. Identical  
876 amino acids are shaded in black, similar amino acids are shaded in grey, and the region encoding  
877 the conserved DNA-binding homeodomain is underlined in orange. **B)** Rooted phylogenetic tree  
878 displaying the clustered relationship of published Gsx1 and Gsx2 protein sequences as well as a  
879 divergence from the *Drosophila* ortholog Ind. Values represent distance scores. Dm, *Drosophila*  
880 *melanogaster*; Lo, *Lepisosteus oculatus*; Ol, *Oryzias latipes*; Xt, *Xenopus tropicalis*. **C)**  
881 Schematic of the zebrafish *gsx1* and *gsx2* gene bodies. Blue boxes represent exons, black lines  
882 represent introns, and orange boxes represent the region encoding the homeodomain. Red  
883 arrowheads represent RT-PCR primer annealing sites. **D)** Agarose gels showing full-length  
884 cDNA transcripts of zebrafish *gsx1* (top), *gsx2* (middle), and *efla* (bottom) at specific ages. Red  
885 text indicates ladder sizes. Upper bands in the *gsx1* gel image represents trace genomic DNA that  
886 includes the 89 bp intron.

887

888 **Fig 2. Expression of *gsx1* and *gsx2* in embryonic zebrafish is dynamic and unique. A-G)**  
889 Lateral mounts showing expression of *gsx1* from 12-48 hpf. **H-N)** Lateral mounts showing  
890 expression of *gsx2* from 12-48 hpf. **O-R)** Dorsal (O & Q) and ventral (P & R) mounts showing  
891 expression of *gsx1* from 30-48 hpf. **S-V)** Dorsal (S & U) and ventral (T & V) mounts showing  
892 expression of *gsx2* from 30-48 hpf. A, B, H, and I are dissecting scope images and scale bar  
893 represents 500µm. Remaining images are compound scope images taken at 20X with samples  
894 mounted under cover glass and anterior facing left, eyes removed in lateral views. Scale bars  
895 represent 100µm. CeP = cerebellar plate, Di = diencephalon, Fb = forebrain, Hb = hindbrain,  
896 Hyp = hypothalamus, Mb = midbrain, OB = olfactory bulb, P = pallium, Po = preoptic area, Pr =  
897 pretegmentum, Sc = spinal cord, Tel = telencephalon, TeO = optic tectum.

898

899 **Fig 3. Expression of *gsx1* and *gsx2* is restricted in late embryonic and early larval stages. A-**  
900 **I)** Expression of *gsx1* from 72-120 hpf. Leftmost column are dorsal views, middle column are  
901 ventral views, and rightmost column are lateral views. **J-O)** Expression of *gsx2* from 72-120 hpf.

902 Left column are dorsal views and rightmost column are lateral views. All images are compound  
903 scope images taken at 20X with samples mounted under cover glass and anterior facing left, eyes  
904 removed in lateral views. Scale bars represent 100 $\mu$ m. Insets are whole brain dissections at the  
905 same age mounted dorsally. Hb = hindbrain, Hyp = hypothalamus, OB = olfactory bulb, P =  
906 pallium, Pr = pretectum, TeO = optic tectum.

907

908 **Fig 4. Fluorescence *in situ* hybridization confirms minimal co-localization of *gsx1* and *gsx2***

909 **during embryonic development. A<sup>i</sup>-A<sup>vi</sup>)** Lateral views of *gsx1* and *gsx2* expression at 24 hpf.

910 **B<sup>i</sup>-B<sup>iii</sup>)** Ventral view of *gsx1* and *gsx2* expression at 24 hpf. **B<sup>iv</sup>-B<sup>vi</sup>)** Cross section view taken at

911 the dashed line in A<sup>vi</sup>. **C<sup>i</sup>-C<sup>vi</sup>)** Lateral views of *gsx1* and *gsx2* expression at 30 hpf. **D<sup>i</sup>-D<sup>iii</sup>)**

912 Ventral view of *gsx1* and *gsx2* expression at 30 hpf. **D<sup>iv</sup>-D<sup>vi</sup>)** Cross section view taken at the

913 dashed line in C<sup>vi</sup>. Lateral views were taken at 20X and ventral/cross section views were taken at

914 40X, all with anterior facing left. All were pseudocolored using FIJI ImageJ and scale bars

915 represent 100 $\mu$ m. For lateral views, eyes were dissected off. Main images are max z-projections

916 and insets are single z-stack slices zoomed into the boxed region shown in the main image. Di =

917 diencephalon, Hb = hindbrain, Mb = midbrain, Sc = spinal cord, Tel = telencephalon.

918

919 **Fig 5. Fluorescence *in situ* hybridization confirms minimal co-localization of *gsx1* and *gsx2***

920 **during late embryonic and early larval development. A<sup>i</sup>-A<sup>vi</sup>)** Lateral views showing

921 expression of *gsx1* and *gsx2* at 48 hpf. **B<sup>i</sup>-B<sup>ii</sup>)** Ventral views showing expression of *gsx1* and

922 *gsx2* at 48 hpf. **B<sup>iv</sup>-B<sup>vi</sup>)** Cross section view taken at the dashed line in A<sup>vi</sup>. **C<sup>i</sup>-C<sup>iii</sup>)** Lateral view

923 showing *gsx1* and *gsx2* expression at 72 hpf. **C<sup>iv</sup>-C<sup>vi</sup>)** Ventral view showing *gsx1* and *gsx2*

924 expression at 72 hpf. Lateral views were taken at 20X and ventral/cross section views were taken

925 at 40X, all with anterior facing left. All were pseudocolored using FIJI ImageJ and scale bars

926 represent 100 $\mu$ m. For lateral views, eyes were dissected off. Main images are max z-projections

927 and insets are single z-stack slices zoomed into the boxed region shown in the main image. CeP

928 = cerebellar plate, Di = diencephalon, Hb = hindbrain, Hyp = hypothalamus, Mb = midbrain, OB

929 = olfactory bulb, P = pallium, Po = preoptic area, Pr = pretectum, Sc = spinal cord, Tel =

930 telencephalon, TeO = optic tectum.

931

932 **Fig 6. *gsx1* and *gsx2* are expressed through 6dpf in the brain. A-C)** Dorsal views showing  
933 expression of *gsx1* and *gsx2* at 6 dpf. **D-F)** Ventral views showing expression of *gsx1* and *gsx2* at  
934 6 dpf. Images taken at 20X with anterior facing left. All were pseudocolored using FIJI ImageJ  
935 and scale bars represent 100 $\mu$ m. Main images are max z-projections and insets are single z-stack  
936 slices zoomed into the boxed region shown in the main image. Hb = hindbrain, Hyp =  
937 hypothalamus, OB = olfactory bulb, P = pallium, Po = preoptic area, Pr = pretectum, Tel =  
938 telencephalon, TeO = optic tectum.

939

940 **Fig 7. *gsx1* TALEN mutants experience stunted growth and *gsx2* TALEN mutants**  
941 **experience swim bladder inflation failure. A)** Schematic of the *gsx1* and *gsx2* gene bodies and  
942 targeted TALEN mutation site (\*). All mutations should result in a premature stop codon. Text  
943 color corresponds with gene body structure (blue = exon, black = intron, orange = homeodomain,  
944 red = mutant sequence). Inset gel shows restriction digest of *gsx1* and *gsx2* amplicons in wild-  
945 type (W), heterozygous (H) and mutant (M) individuals; endonuclease cutting is disrupted in  
946 mutants. **B)** Comparison of the standard length (SL, red line) of *gsx1 $\Delta$ 11* wild-type,  
947 heterozygous, and mutant siblings at 30 dpf. Images are dissecting scope images and distances  
948 between tick marks represent 1mm. Graph shows the quantification of the long-term growth  
949 study data from 4 dpf to 99 dpf. Asterisks of each color indicate significant differences between  
950 that group and the genotype of the same color (blue, wild-type; red, heterozygous; green,  
951 mutant). **C)** Top, comparison of *gsx1 $\Delta$ 11* and *gsx2 $\Delta$ 13a* wild-type and mutant larvae with (+SB)  
952 and without (-SB) swim bladders, respectively; Bottom, quantification of the percentage of  
953 larvae of each genotype with and without swim bladders (*gsx1* n=73, *gsx2* n=60).

954

955 **Fig 8. *Gsx1* and *Gsx2* differentially regulate *dlx2a* and *dlx2b* expression. A)** Schematic of  
956 *Gsx1* and 2 enhancer sequences in the *Dlx2* orthologs. **B)** Left, *dlx2a* expression at 30 hpf in  
957 wild-type, *gsx1 $\Delta$ 11*<sup>-/-</sup>, *gsx2 $\Delta$ 13a*<sup>-/-</sup>, and *gsx1 $\Delta$ 11*<sup>-/-</sup>;*gsx2 $\Delta$ 13a*<sup>-/-</sup> zebrafish. Images are 20X  
958 compound scope images with samples mounted under cover glass, eyes dissected, and anterior  
959 facing left. Scale bar = 50 $\mu$ m. Right, FIJI-ImageJ quantification of *dlx2a* expression in the  
960 telencephalon (grey bars) and diencephalon (white bars). Genotypes and sample size are listed  
961 under the X axis. Different letters represent significant differences. **C)** Left, *dlx2b* expression at  
962 30 hpf in wild-type, *gsx1 $\Delta$ 11*<sup>-/-</sup>, *gsx2 $\Delta$ 13a*<sup>-/-</sup>, and *gsx1 $\Delta$ 11*<sup>-/-</sup>;*gsx2 $\Delta$ 13a*<sup>-/-</sup> zebrafish; Right,



963 quantification of *dlx2b* expression. **D**) RT-qPCR data showing relative expression of *dlx2a* (blue  
964 bars) and *dlx2b* (red bars) in wild-type, *gsx1Δ11*<sup>-/-</sup>, *gsx2Δ13a*<sup>-/-</sup>, and *gsx1Δ11*<sup>-/-</sup>;*gsx2Δ13a*<sup>-/-</sup>  
965 zebrafish compared to the reference gene *efla*. Different letters indicate significant differences  
966 within each target gene. **E**) Schematics of *gsx1*, *gsx2*, *dlx2a*, and *dlx2b* expression at 30 hpf.

967

968 **Figure S1. Regulation of *dlx5a*, *dlx6a*, and *foxp2* by Gsx1 and Gsx2.** **A**) Schematic of Gsx1  
969 and 2 enhancer sequences upstream of the zebrafish *dlx5a*, *dlx6a*, and *foxp2* gene bodies. **B<sup>i</sup>-B<sup>iv</sup>**.  
970 *dlx5a* expression at 30 hpf in wild-type, *gsx1Δ11*<sup>-/-</sup>, *gsx2Δ13a*<sup>-/-</sup>, and *gsx1Δ11*<sup>-/-</sup>;*gsx2Δ13a*<sup>-/-</sup>  
971 zebrafish. Images are 20X compound scope images with samples mounted under cover glass,  
972 eyes dissected, and anterior facing left. Scale bar = 50μm. **C**. FIJI-ImageJ quantification of *dlx5a*  
973 expression. Different letters represent significant differences. **D<sup>i</sup>-D<sup>iv</sup>**. *dlx6a* expression at 30 hpf  
974 in wild-type, *gsx1Δ11*<sup>-/-</sup>, *gsx2Δ13a*<sup>-/-</sup>, and *gsx1Δ11*<sup>-/-</sup>/*gsx2Δ13a*<sup>-/-</sup> zebrafish. **E**. Quantification  
975 of *dlx6a* expression. **E<sup>i</sup>-E<sup>iv</sup>**. *foxp2* expression at 30 hpf in wild-type, *gsx1Δ11*<sup>-/-</sup>, *gsx2Δ13a*<sup>-/-</sup>,  
976 and *gsx1Δ11*<sup>-/-</sup>/*gsx2Δ13a*<sup>-/-</sup> zebrafish. **G**. Quantification of *foxp2* expression area.

977

978

979

980

981

982

983

984

985

986

987

988

989 **Table S1. List of NCBI sequences for gene and protein alignments and analyses.**

| <b>Gene sequences</b>          |                |                         |
|--------------------------------|----------------|-------------------------|
| <b>Species</b>                 | <b>Gene</b>    | <b>Accession number</b> |
| <i>Danio rerio</i>             | <i>gsx1</i>    | NM_001012251.1          |
| <i>Danio rerio</i>             | <i>gsx2</i>    | NM_001025512.2          |
| <i>Danio rerio</i>             | <i>dlx2a</i>   | AF349437.2              |
| <i>Danio rerio</i>             | <i>dlx2b</i>   | NM_131297.2             |
| <i>Mus musculus</i>            | <i>Dlx2</i>    | NM_010054.2             |
| <i>Homo sapiens</i>            | <i>Dlx2</i>    | NM_004405.4             |
| <i>Danio rerio</i>             | <i>dlx5a</i>   | NM_131306.2             |
| <i>Danio rerio</i>             | <i>dlx6a</i>   | NM_131323.1             |
| <i>Danio rerio</i>             | <i>foxp2</i>   | NM_001030082.2          |
| <b>Protein sequences</b>       |                |                         |
| <b>Species</b>                 | <b>Protein</b> | <b>Accession number</b> |
| <i>Danio rerio</i>             | Gsx1           | AAI65050.1              |
| <i>Mus musculus</i>            | Gsx1           | AAI37770.1              |
| <i>Rattus norvegicus</i>       | Gsx1           | NP_001178592.1          |
| <i>Homo sapiens</i>            | Gsx1           | NP_663632.1             |
| <i>Xenopus tropicalis</i>      | Gsx1           | NP_001039254            |
| <i>Oryzias latipes</i>         | Gsx1           | NP_001098303            |
| <i>Lepisosteus oculatus</i>    | Gsx1           | XP_006627824            |
| <i>Danio rerio</i>             | Gsx2           | AAI64330.1              |
| <i>Mus musculus</i>            | Gsx2           | NP_573555.1             |
| <i>Rattus norvegicus</i>       | Gsx2           | NP_001131035.1          |
| <i>Homo sapiens</i>            | Gsx2           | NP_573574.2             |
| <i>Xenopus tropicalis</i>      | Gsx2           | AAI58504.1              |
| <i>Oryzias latipes</i>         | Gsx2           | NP_001116381            |
| <i>Lepisosteus oculatus</i>    | Gsx2           | XP_006630061            |
| <i>Drosophila melanogaster</i> | Ind            | NP_996087.2             |

990

991

992 **Table S2. Table of primers, plasmids, and antibodies.**

| PRIMERS AND PLASMIDS               |                                                                      |                                      |                                                                     |
|------------------------------------|----------------------------------------------------------------------|--------------------------------------|---------------------------------------------------------------------|
| Gene                               | Primer sequence                                                      | Used for                             | Additional information                                              |
| <i>gsx1</i>                        | FW: 5'-AGCATTGTTGGTACACGAGCGA-3'<br>RV: 5'-GGTGTGGCGTACAGAGTCTT-3'   | Semi-quantitative RT-PCR             |                                                                     |
| <i>gsx2</i>                        | FW: 5'-CAAGTTCTTGGAGCATCGCC-3'<br>RV: 5'-TCCGTTTAAAAGTGCCACGT-3'     |                                      |                                                                     |
| <i>efla</i>                        | FW: 5'-TACAAATGCGGTGGAATCGAC-3'<br>RV: 5'-TGTGCAGACTTTGTGACCTTG-3'   |                                      |                                                                     |
| <i>gsx1</i>                        | Cheesman and Eisen, 2004                                             | Antisense mRNA <i>in situ</i> probes | Plasmid linearized with ClaI, <i>in vitro</i> transcribed with T3   |
| <i>gsx2</i>                        | FW: 5'-ACAACAGCCACATACAGAACG-3'<br>RV: 5'-CACAGCTTCTCAGTAGTCTAGGA-3' |                                      | Plasmid linearized with EcoRI, <i>in vitro</i> transcribed with SP6 |
| <i>dlx2a</i>                       | Akimenko <i>et al.</i> , 1994                                        |                                      | Plasmid linearized with NcoI, <i>in vitro</i> transcribed with SP6  |
| <i>dlx2b</i>                       | FW: 5'-GCGCAGATTCCAGAAGACC-3'<br>RV: 5'-ACCCGTTTGTACTTGGAATGTG-3'    |                                      | Plasmid linearized with NotI, <i>in vitro</i> transcribed with SP6  |
| <i>dlx5a</i>                       | FW: 5'-ATTTAGGTGACACTATAGCCGAAGTAAGGA TGGTCAAC-3'                    |                                      | <i>in vitro</i> transcribed with T7 polymerase                      |
| <i>dlx6a</i>                       | FW: 5'-ATTTAGGTGACACTATAGACAGCA GAAAACAACAGTGA-3'                    |                                      | <i>in vitro</i> transcribed with T7 polymerase                      |
| <i>foxp2</i>                       | FW: 5'-GCCACACCGACAAATACTCC-3'<br>RV: 5'-ATTTAGGTGACACTATAGCTGCTG    |                                      | <i>in vitro</i> transcribed with SP6 polymerase                     |
| <i>gsx1Δ11</i>                     | FW: 5'-TCCAGATCCACGACAGTTCC-3'<br>RV: 5'-TGACTGCTGCTATTTTCTGTTGA-3'  | Genotyping                           |                                                                     |
| <i>gsx2Δ13a</i>                    | FW: 5'-TGCGTATCCTCACACATCCA-3'<br>RV: 5'-TGTCCAGGGTGCCTAAC-3'        |                                      |                                                                     |
| <i>gsx1Δ05</i>                     | FW: 5'-AGCCCTCCGTTATTTCCGTA-3'<br>RV: 5'-CGTTTGCTGCTCTGAAGTT-3'      | Confirmation of TALENs efficacy      |                                                                     |
| <i>gsx2Δ05</i>                     | FW: 5'-AGCAATCATGTTCGAGGTCTT-3'<br>RV: 5'-GCGCACTCACTCACCTAGAGA-3'   |                                      |                                                                     |
| <i>dlx2a</i>                       | FW: 5'-CCTGCAGAGGAGGTTTCAGA-3'<br>RV: 5'-GGGTGGGATCTCTCCACTTT-3'     | qPCR                                 |                                                                     |
| <i>dlx2b</i>                       | FW: 5'-TCCTATGGCGCTTATGGAAC-3'<br>RV: 5'-GAGTAGATGGTTCGCGGTTT-3'     |                                      |                                                                     |
| <i>efla</i>                        | FW: 5'-TGATCTACAAATGCGGTGGA-3'<br>RV: 5'-CAATGGTGATACCACGCTCA-3'     |                                      |                                                                     |
| ANTIBODIES                         |                                                                      |                                      |                                                                     |
| Name                               |                                                                      | Manufacturer                         | Item #                                                              |
| Anti-Digoxigenin-AP, Fab fragments |                                                                      | Roche                                | #11093274910                                                        |

993

994

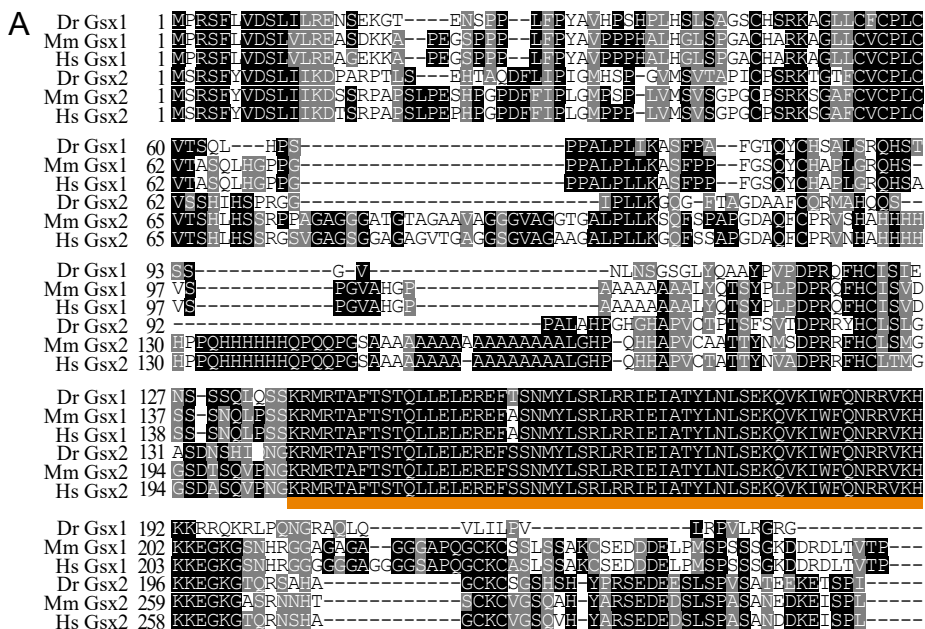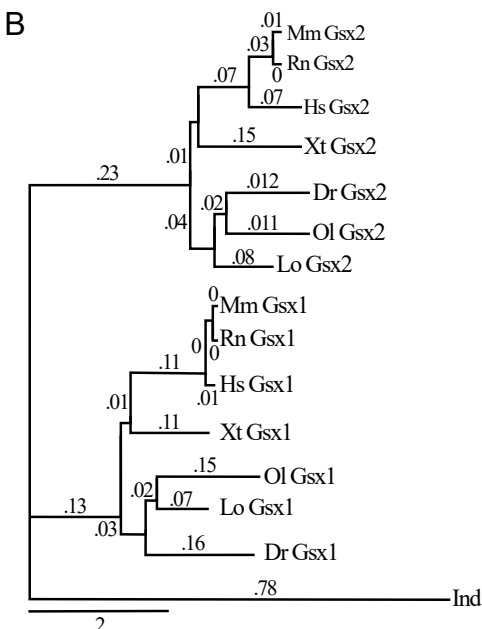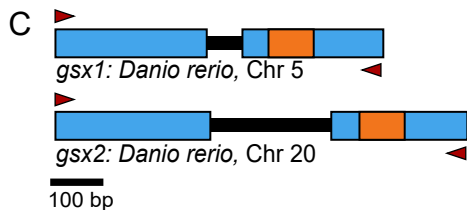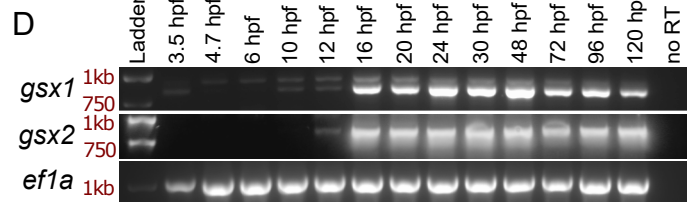

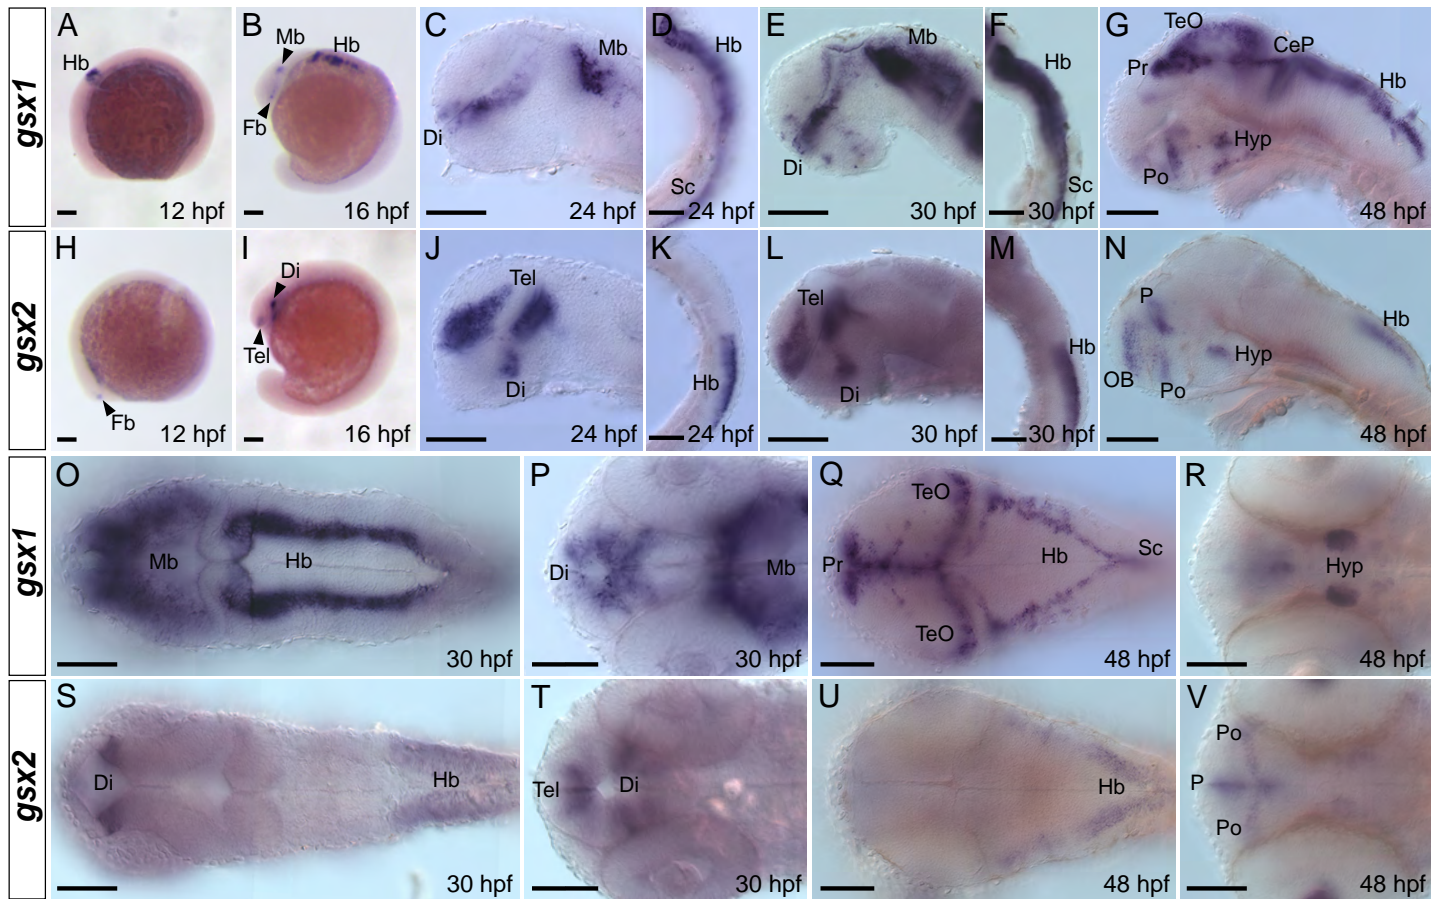

***gsx1******gsx2***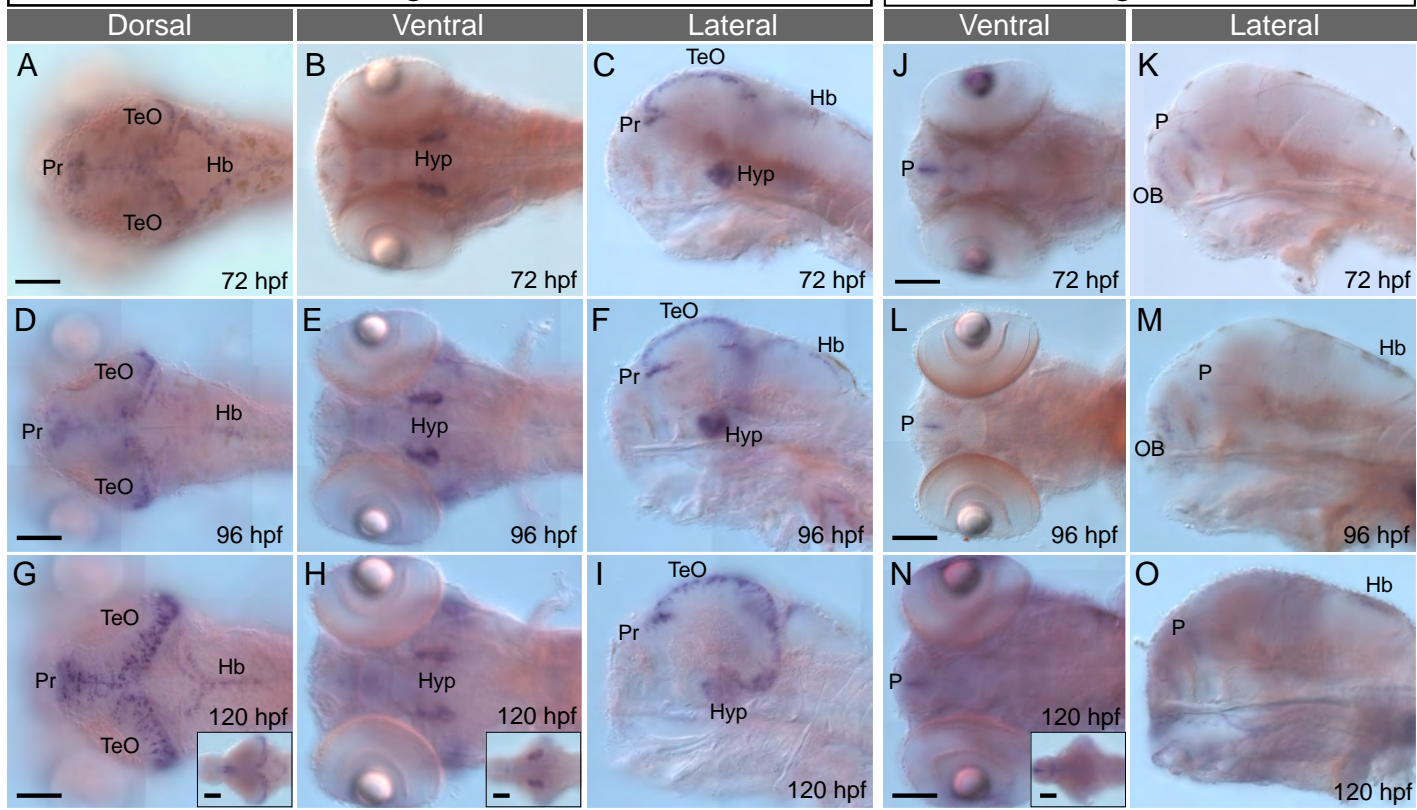

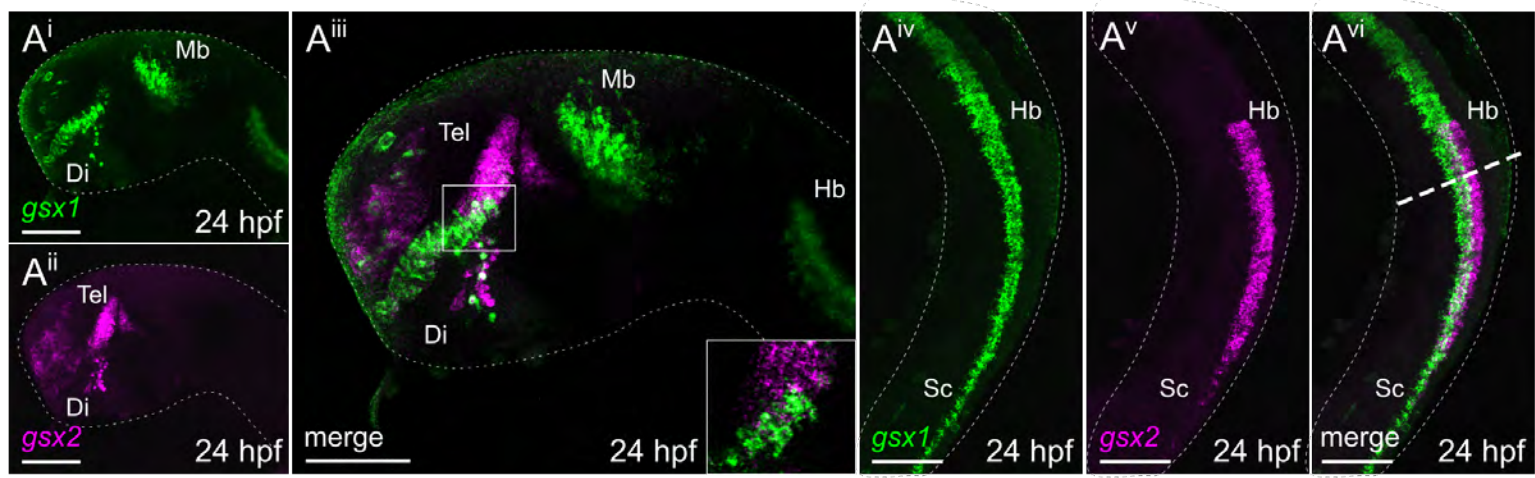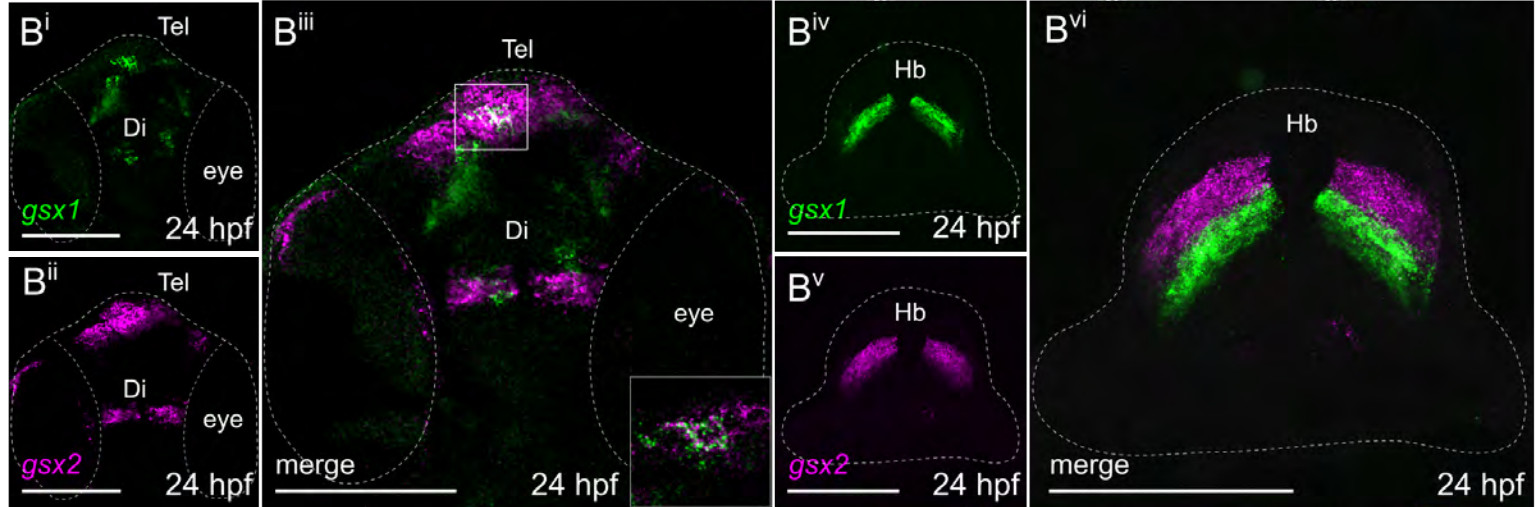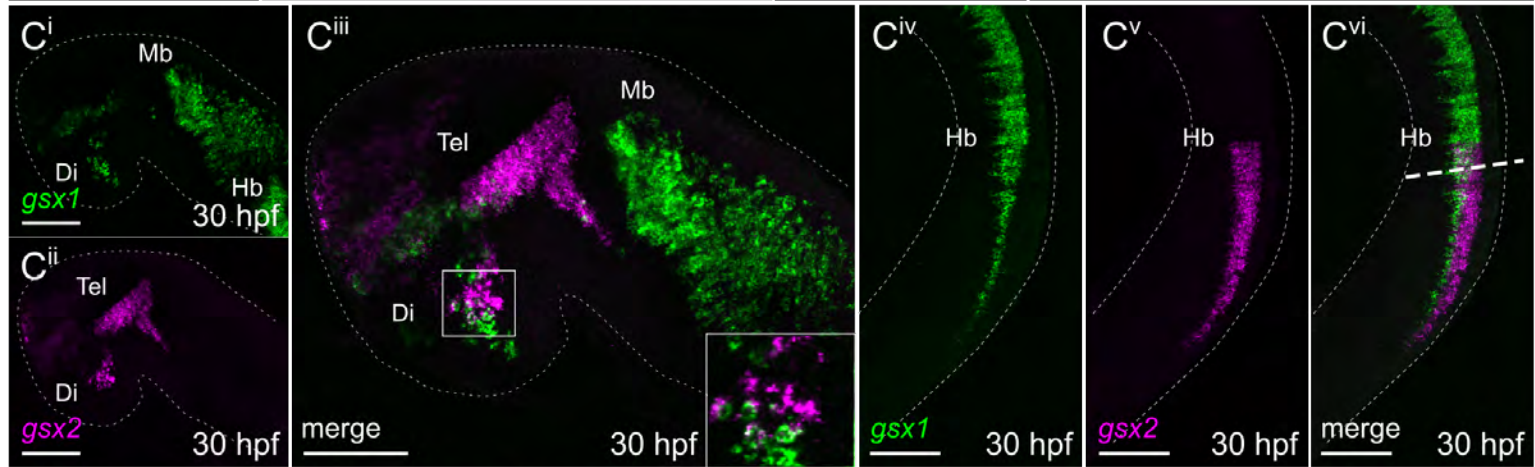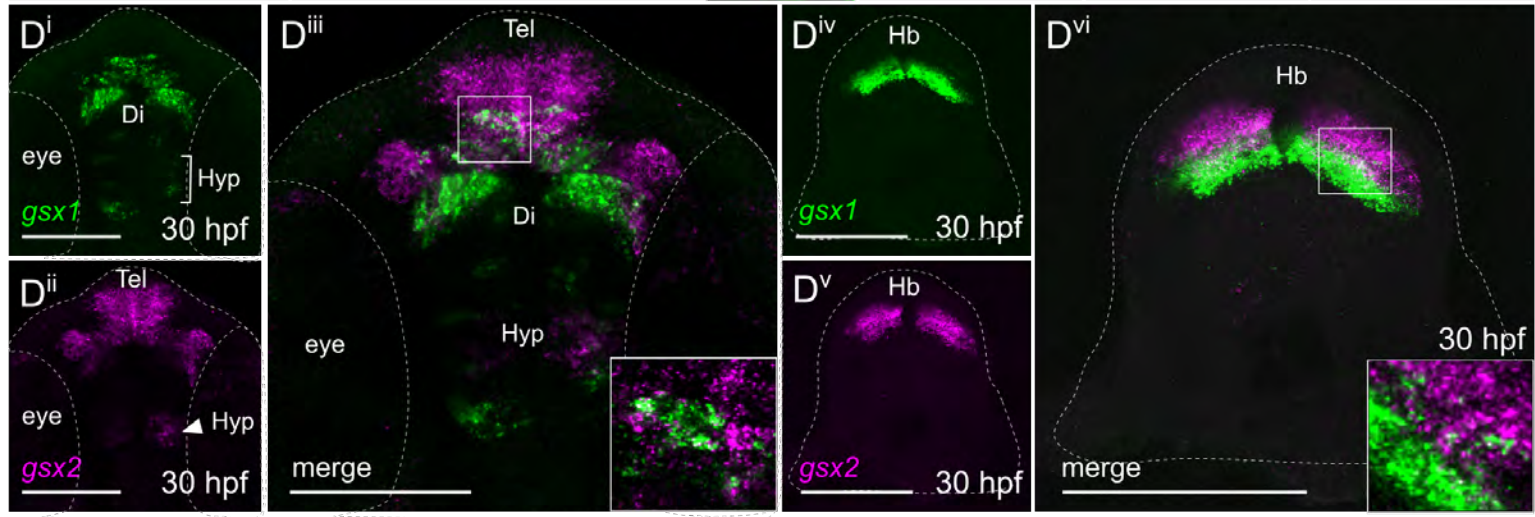

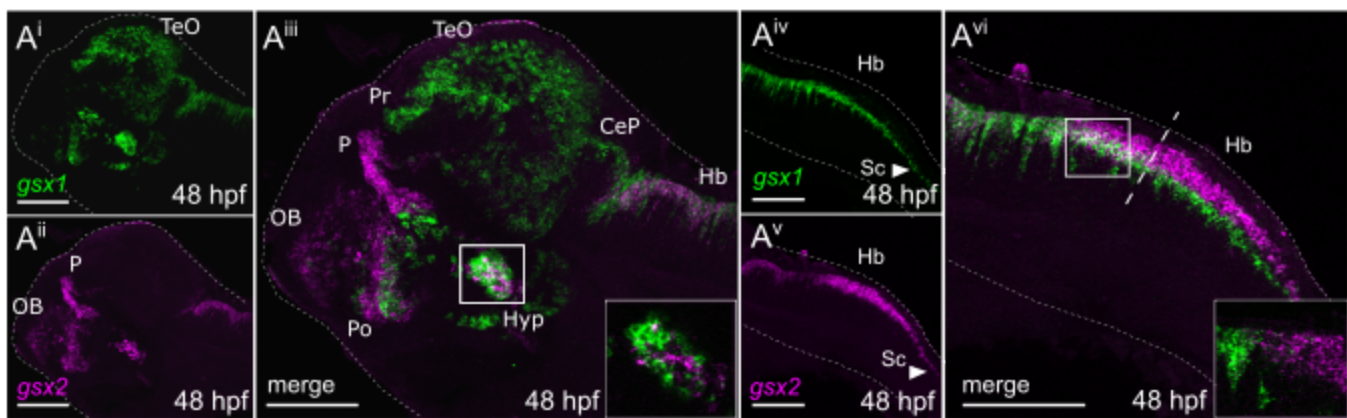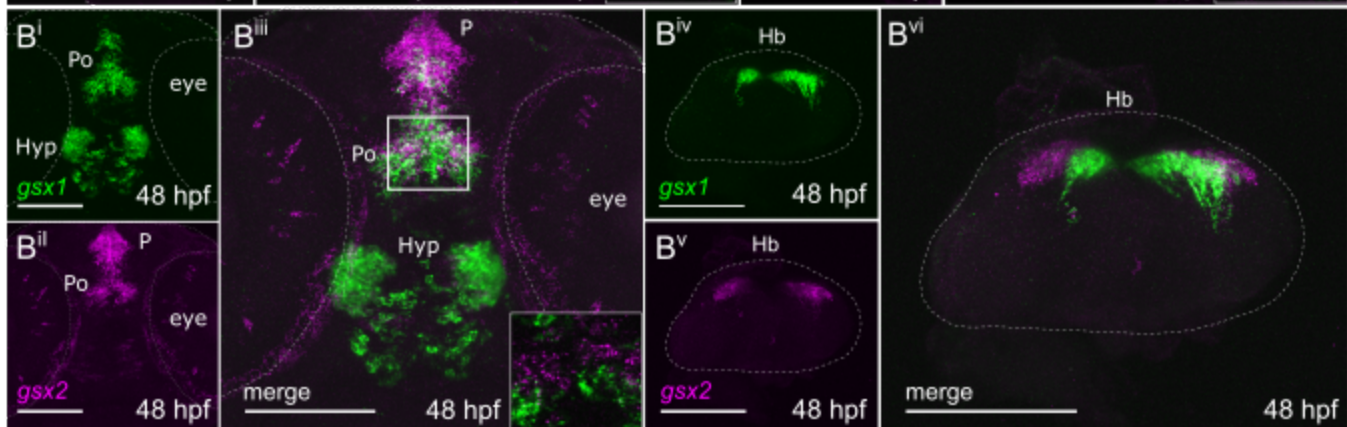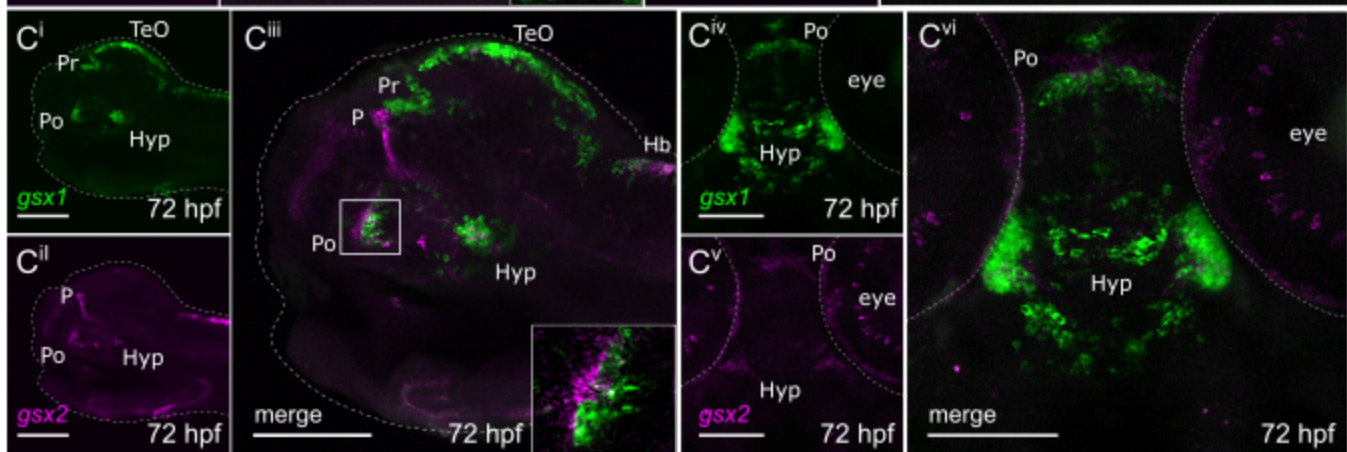



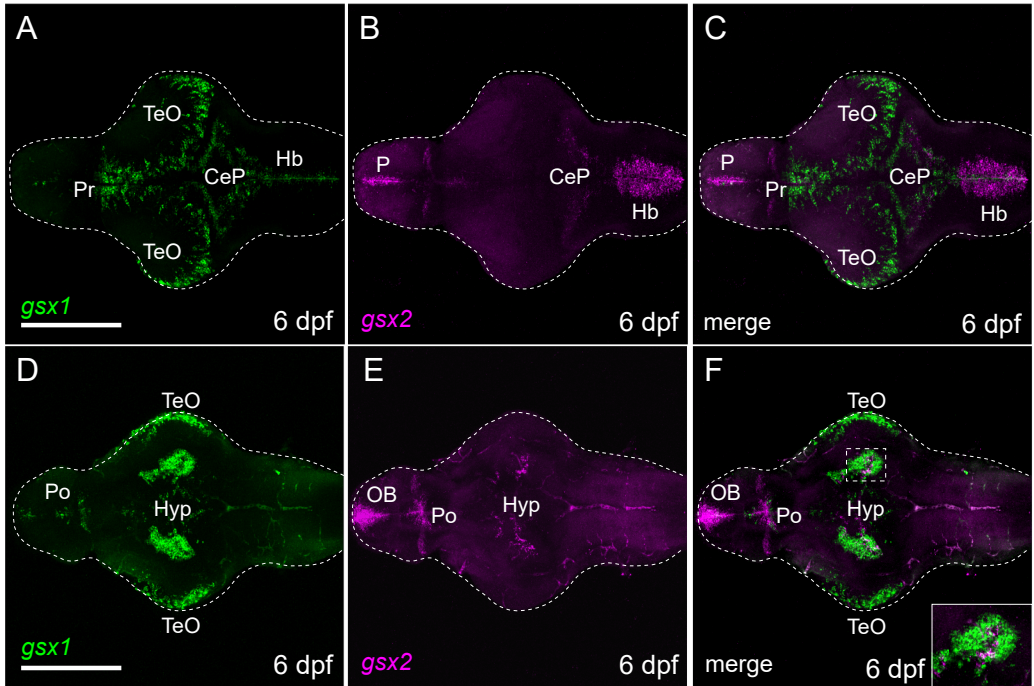

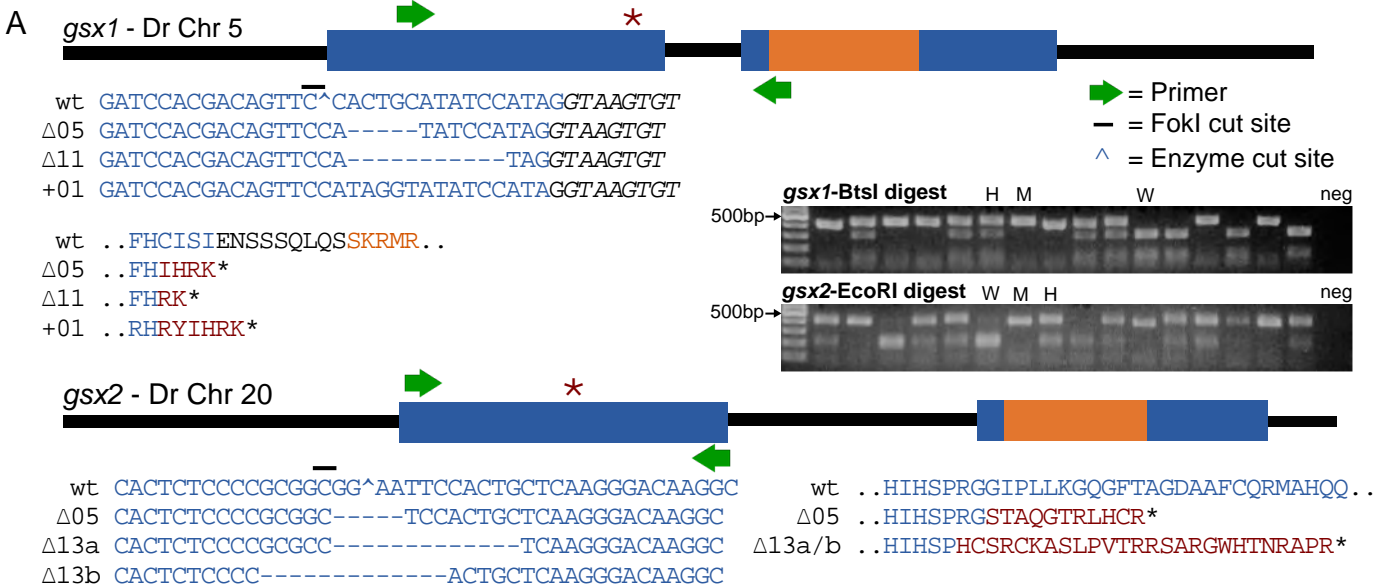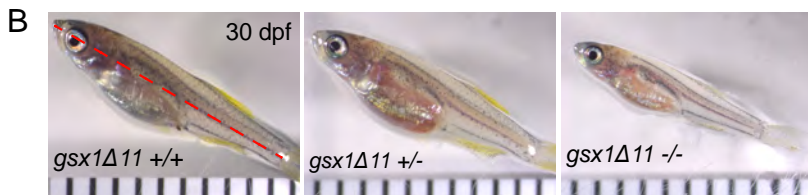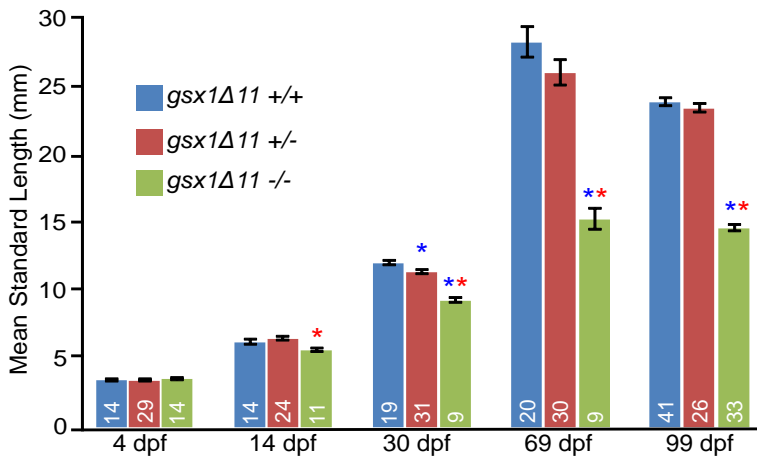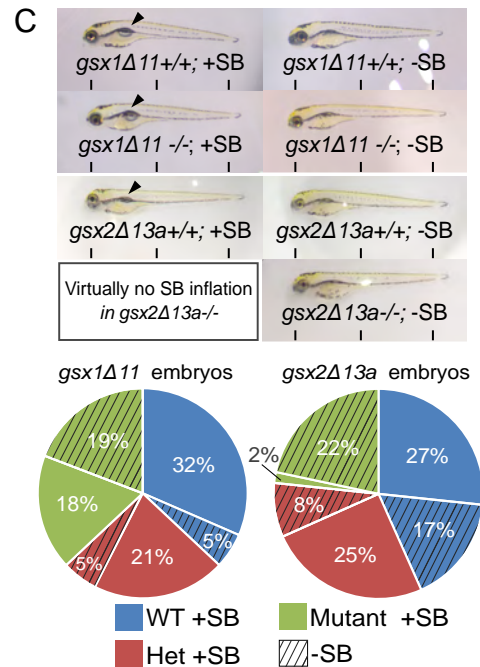

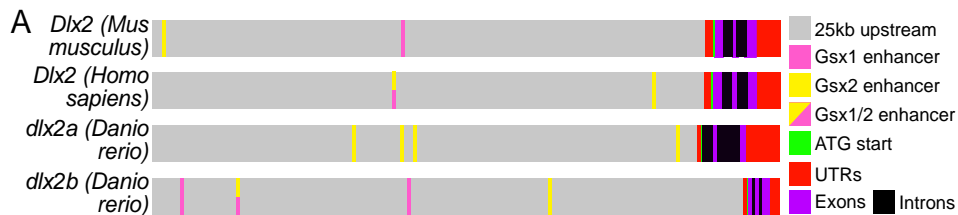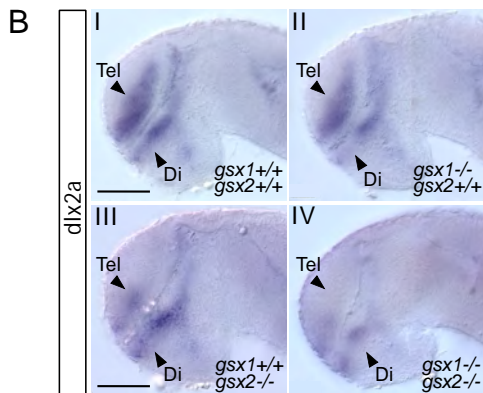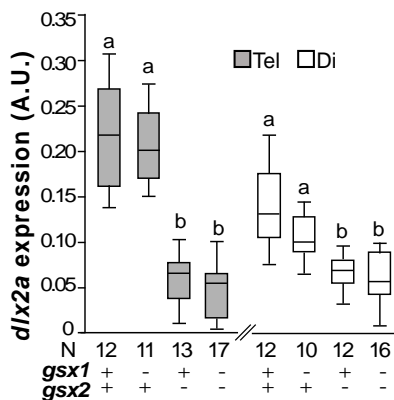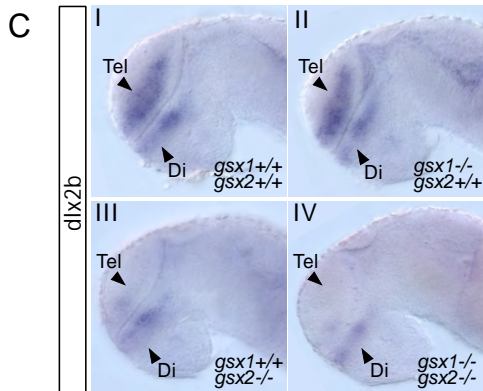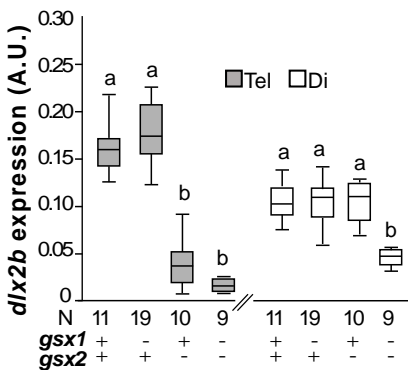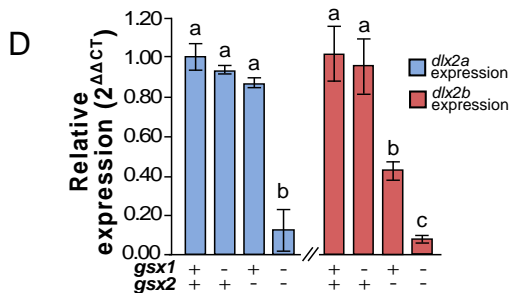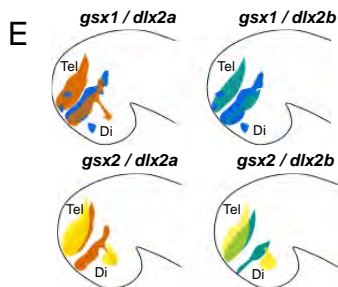

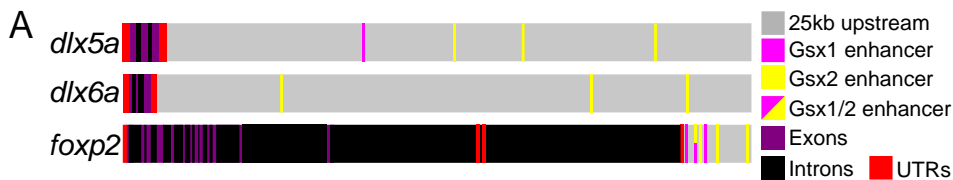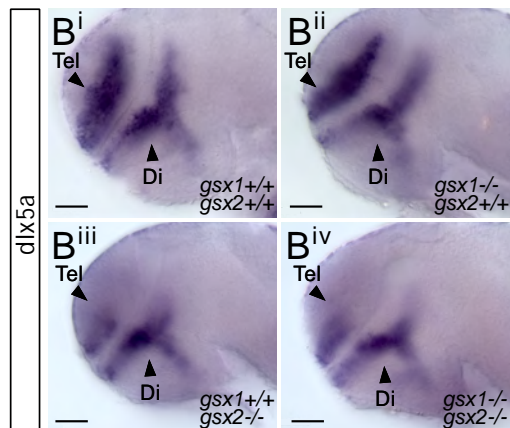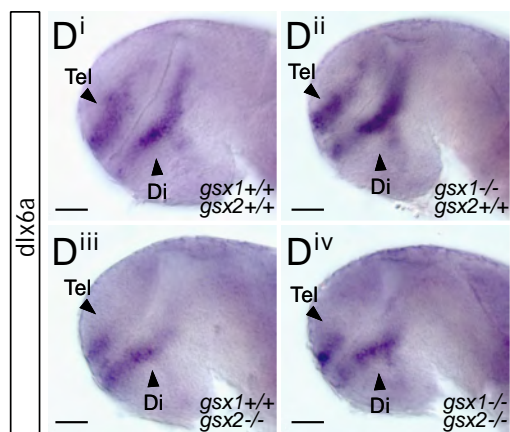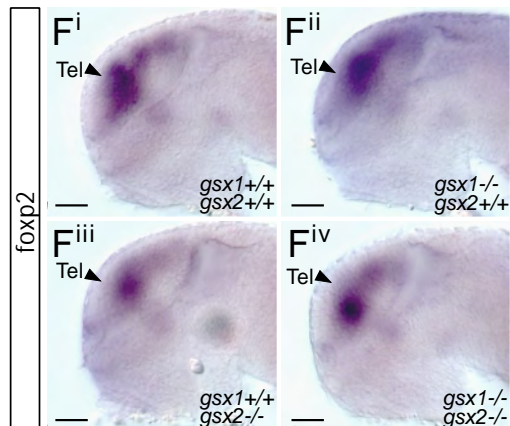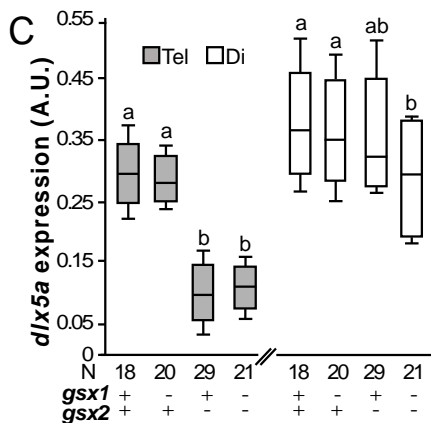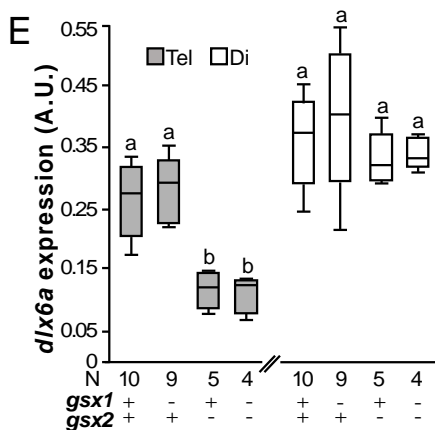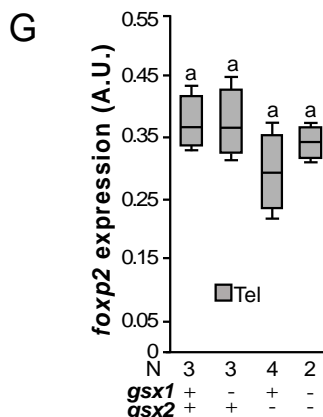

Source: https://biorxiv.org/content/10.1101/2021.09.13.460150v1.full.pdf
